# Supplementary figures and images for: Prediction of the two-dimensional ferromagnetic semiconductor Janus 2H-ZrTeI monolayer with large valley and piezoelectric polarizations
Source: Royal Society of Chemistry journal article supplement (doi:10.1039/d4nr01692k), 2024-01-01

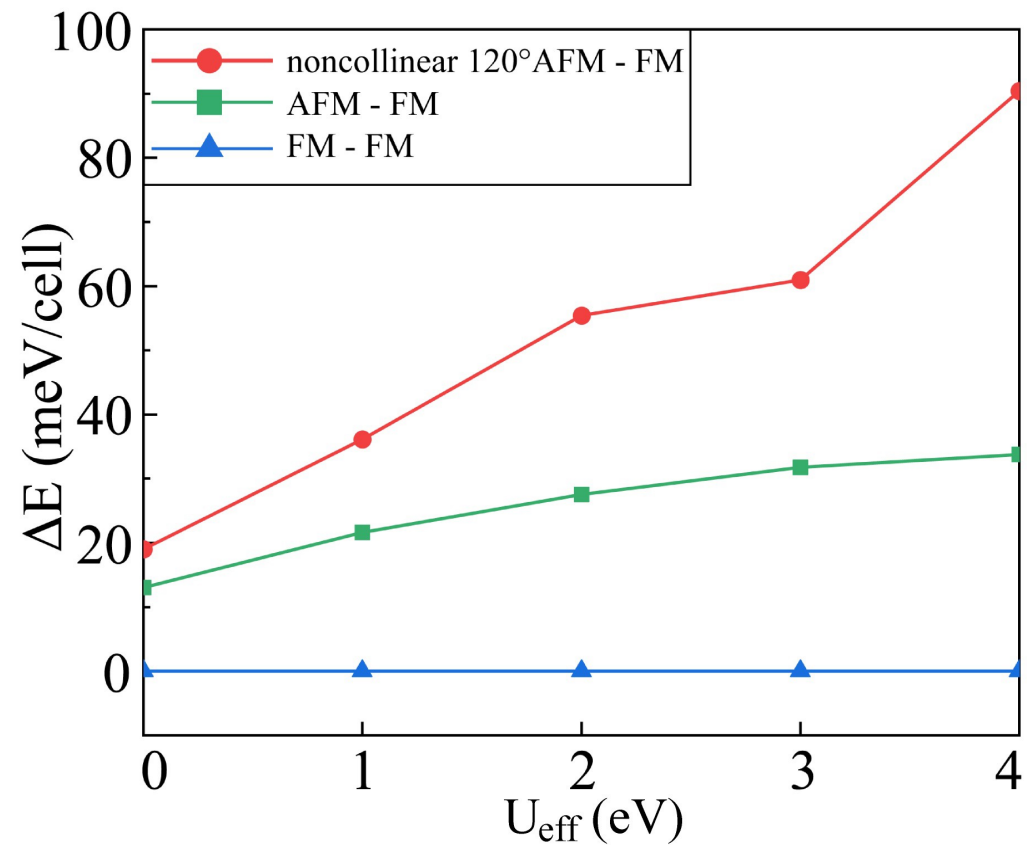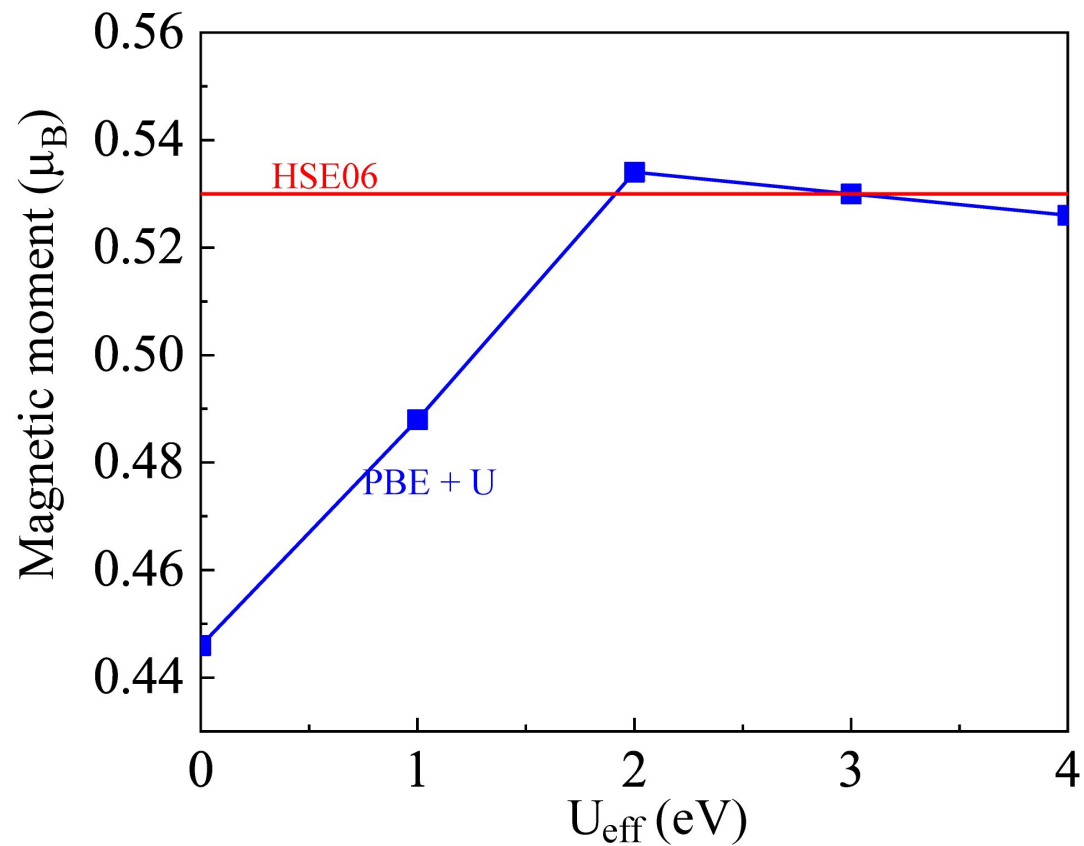

Supplement: d4nr01692k10.pdf [file d4nr01692k10.pdf]

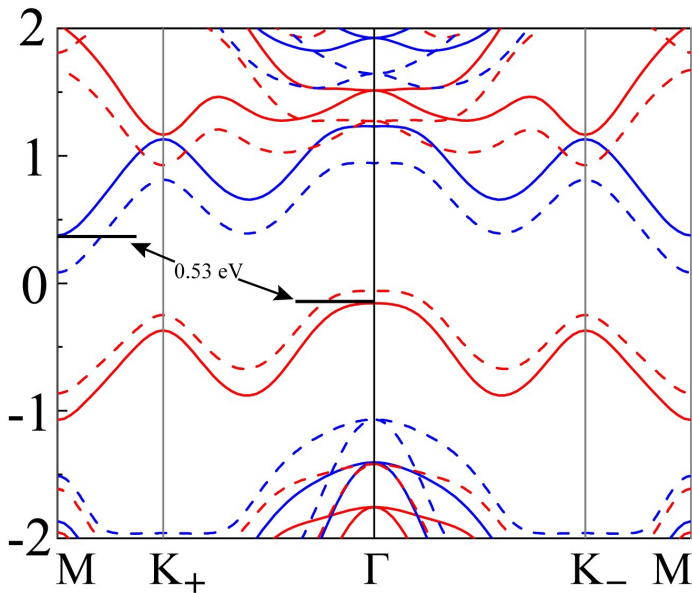

Supplement: d4nr01692k11.pdf [file d4nr01692k11.pdf]

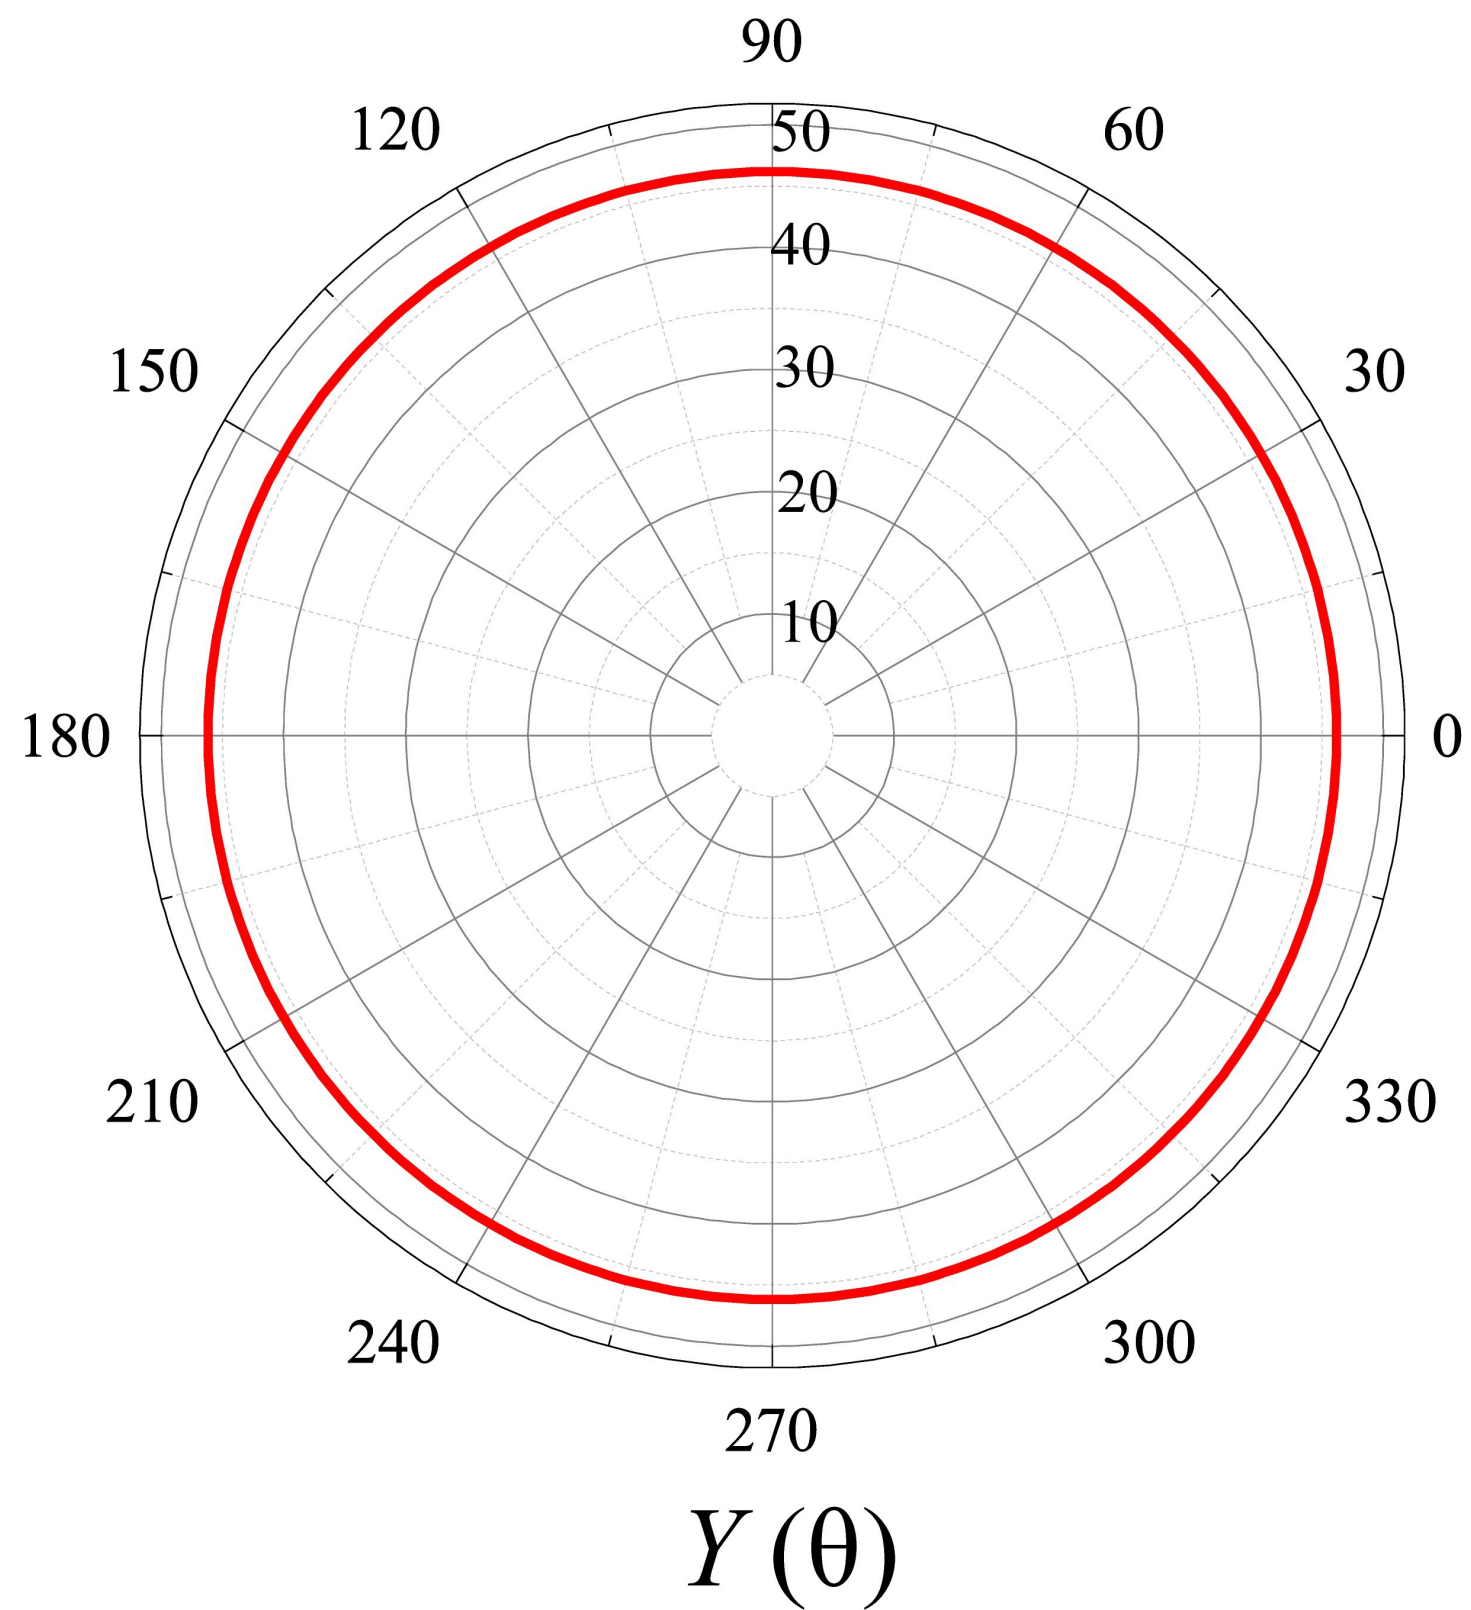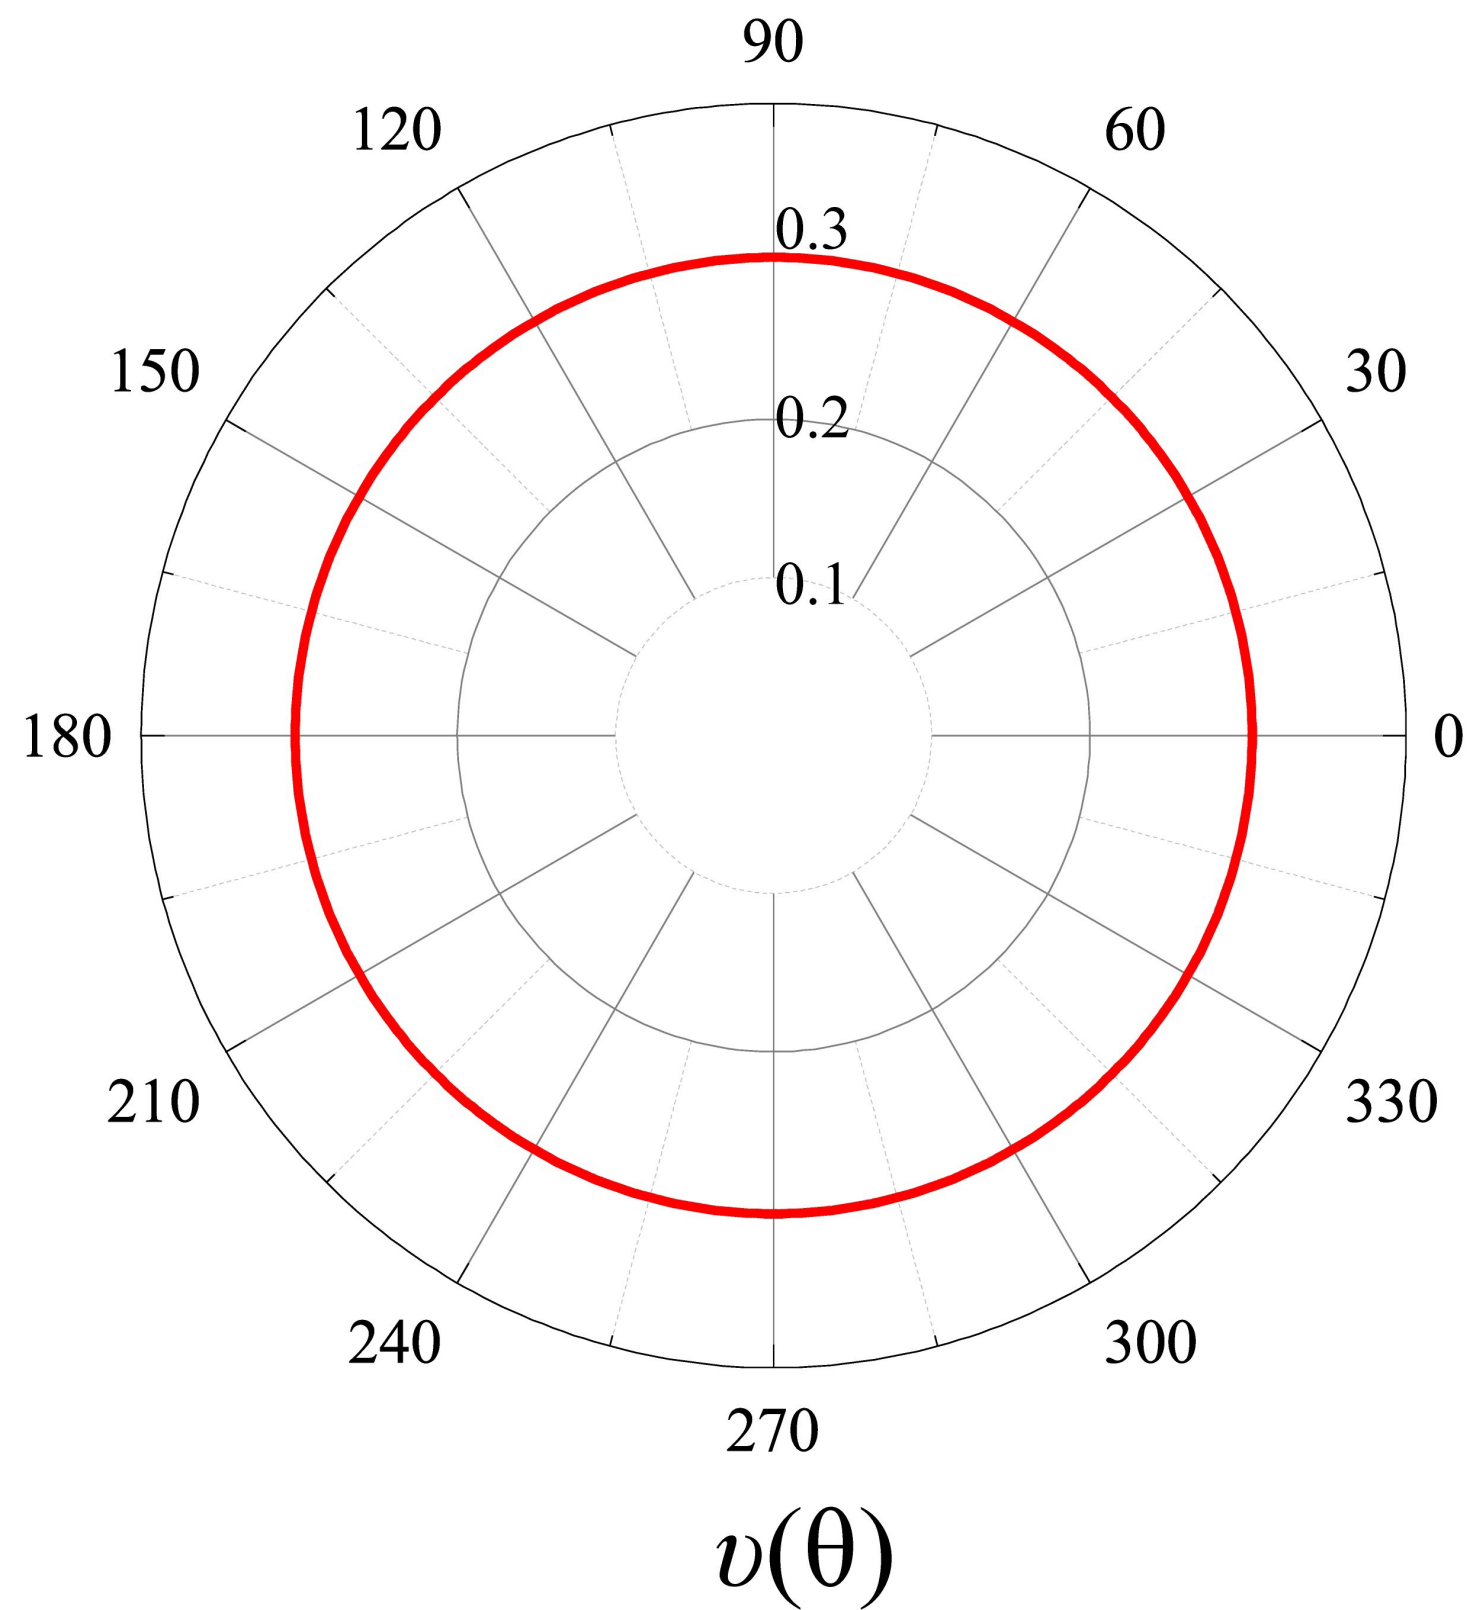

Supplement: d4nr01692k12.pdf [file d4nr01692k12.pdf]

Supplementary Information (SI) for Nanoscale.  
This journal is © The Royal Society of Chemistry 2024

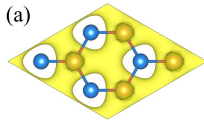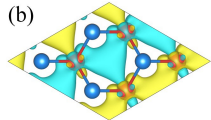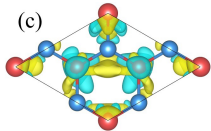

Supplement: d4nr01692k13.pdf [file d4nr01692k13.pdf]

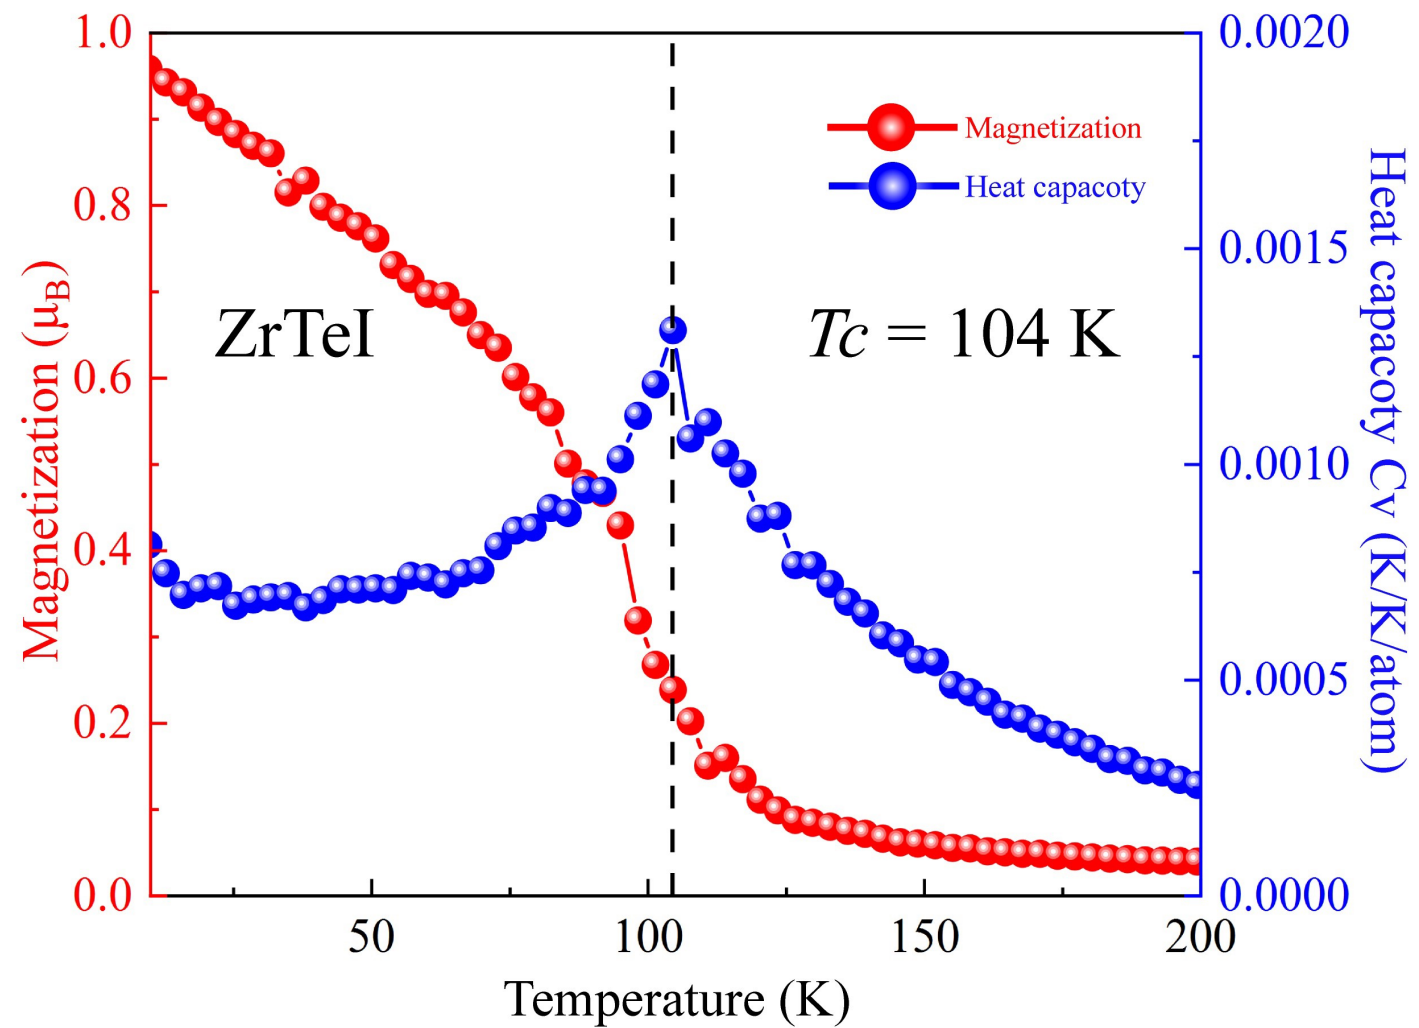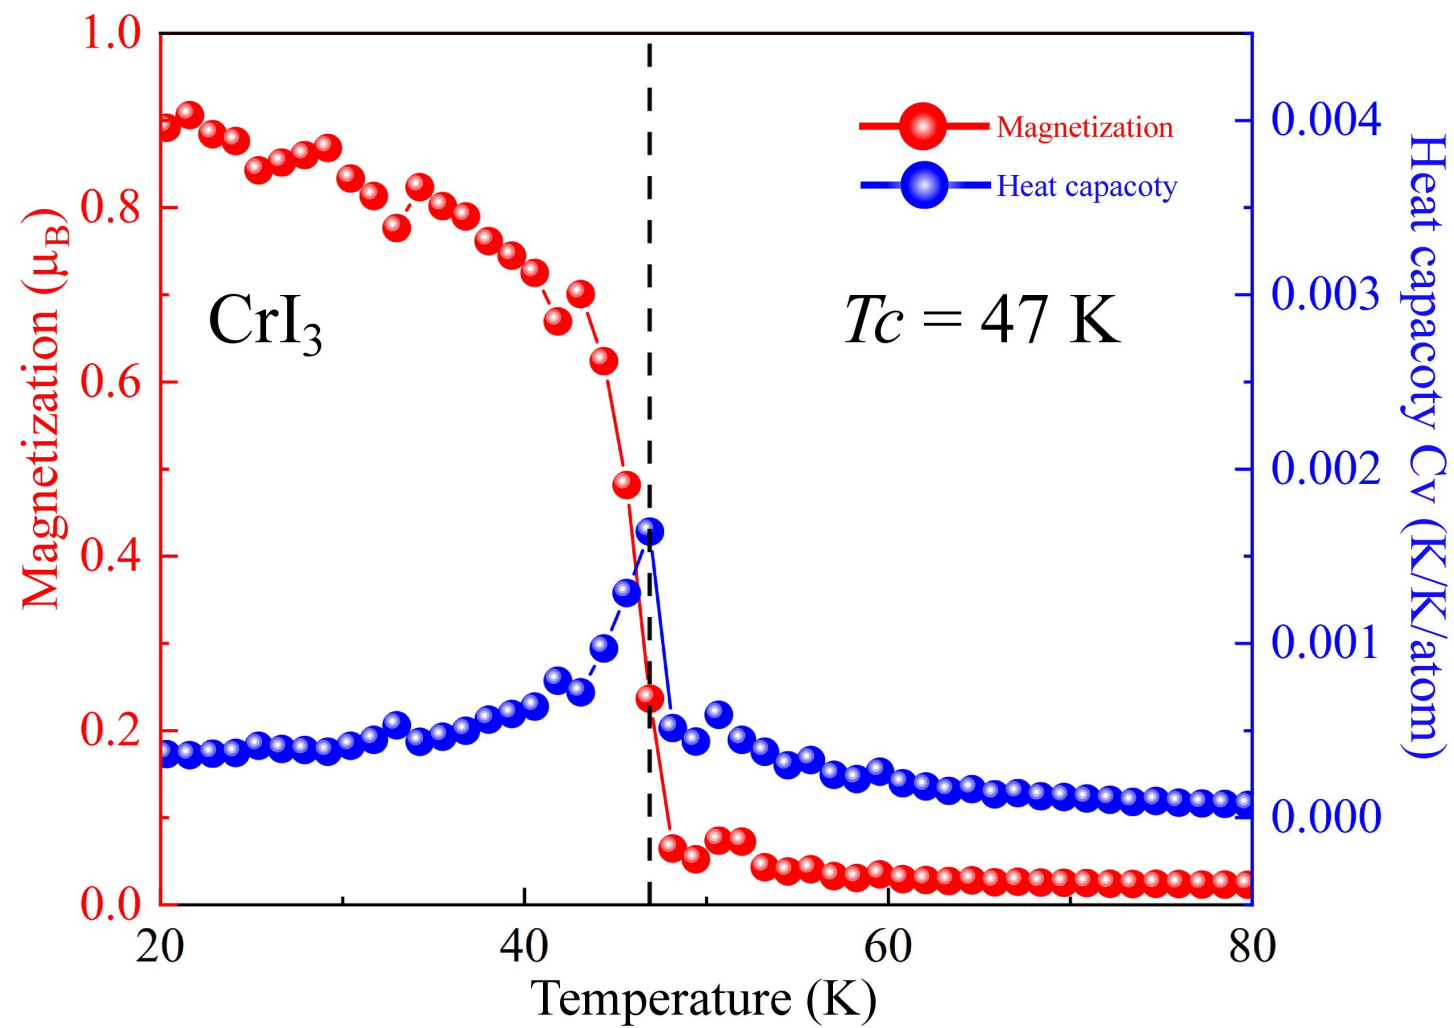

Supplement: d4nr01692k14.pdf [file d4nr01692k14.pdf]

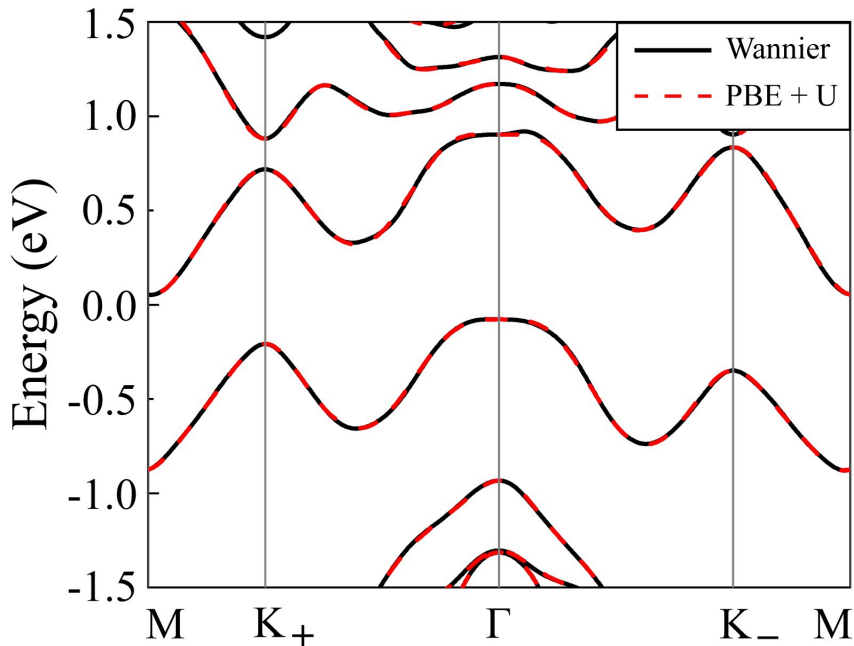

Supplement: d4nr01692k15.pdf [file d4nr01692k15.pdf]

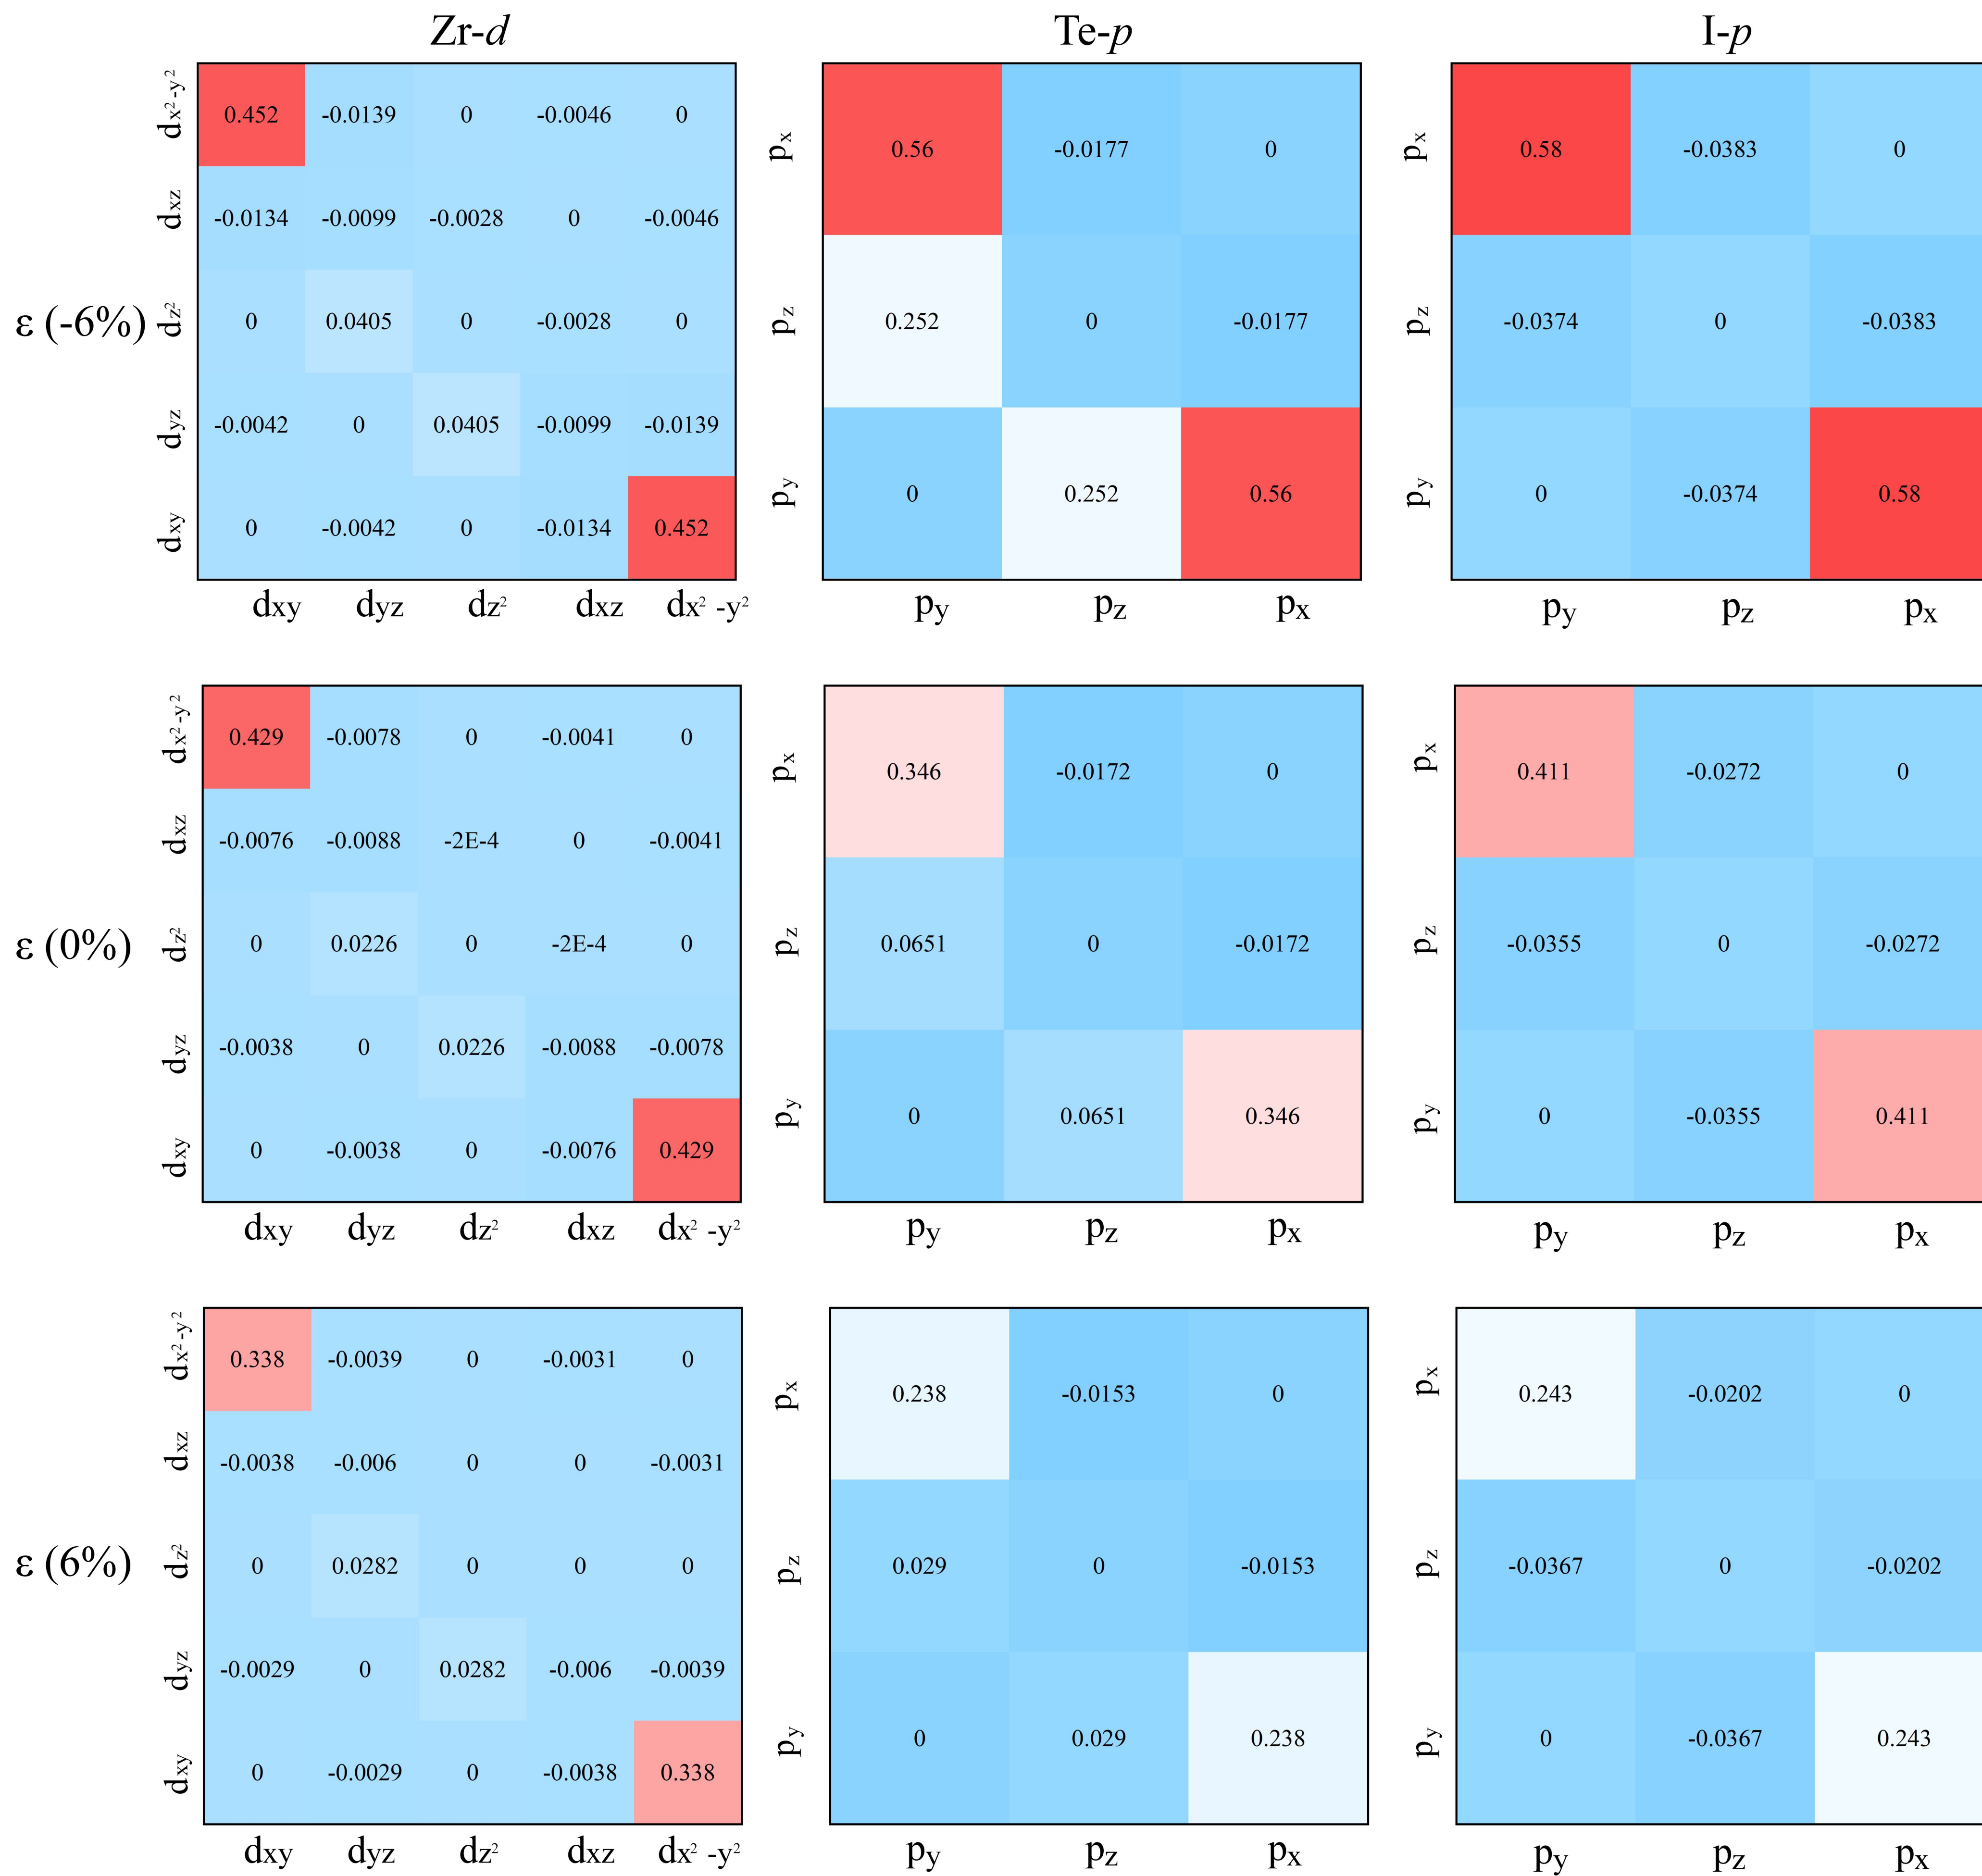

Supplement: d4nr01692k16.pdf [file d4nr01692k16.pdf]

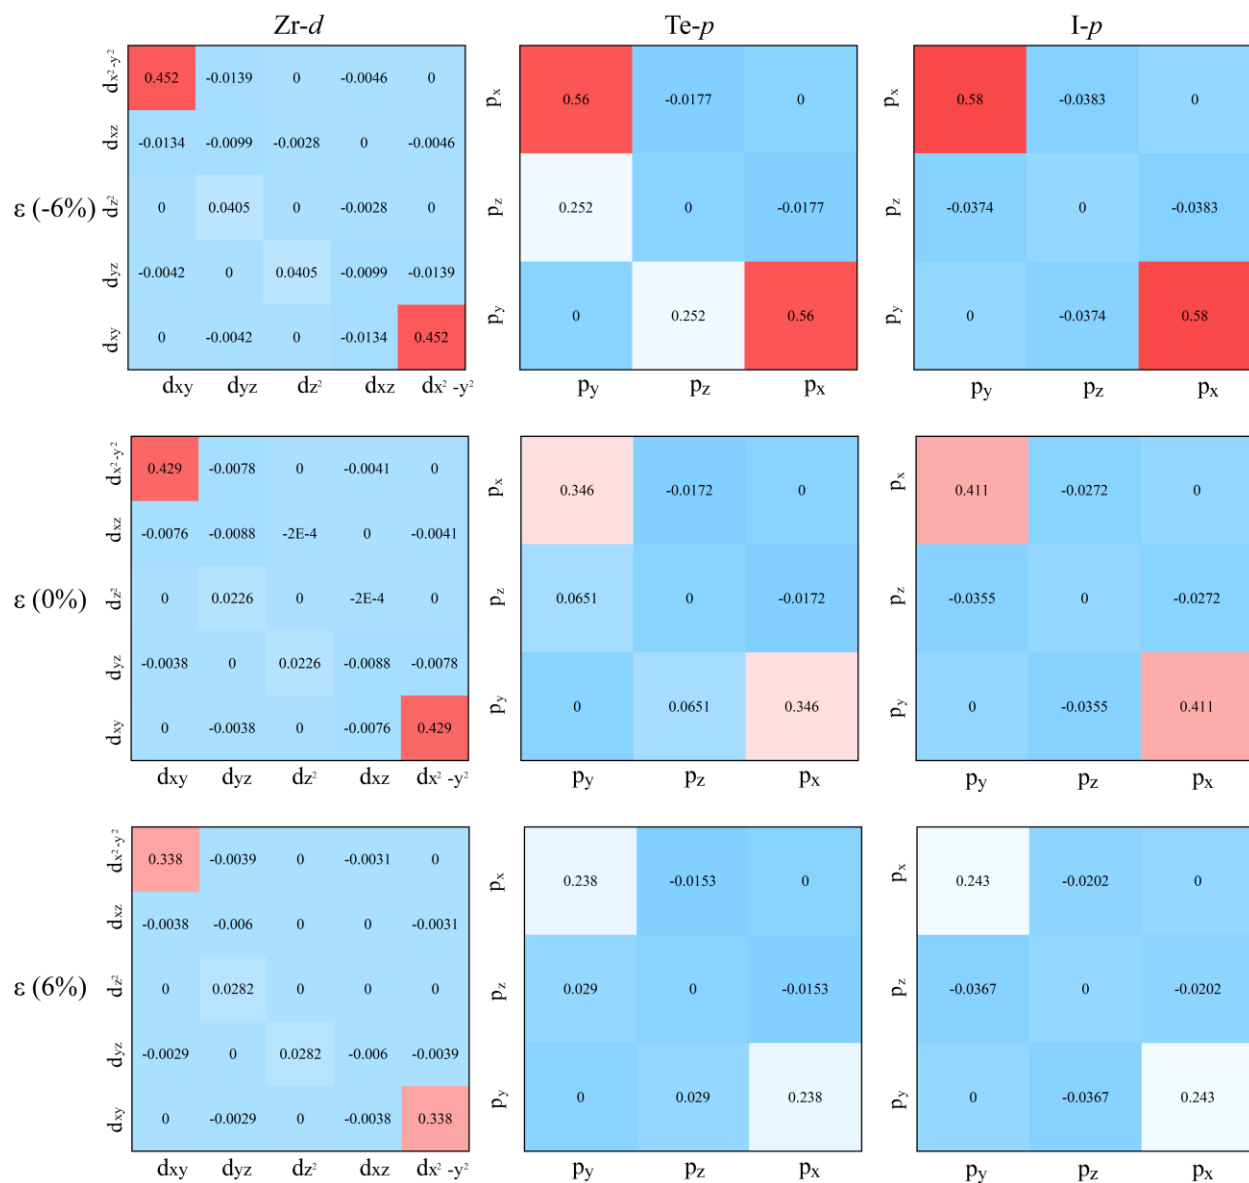

Fig. S9. Zr-d and Te/I-p orbital-resolved MAEs of Janus 2H-ZrTeI monolayers at 6%, 0% and 6% strain.

Supplement: d4nr01692k3.pdf [file d4nr01692k3.pdf]

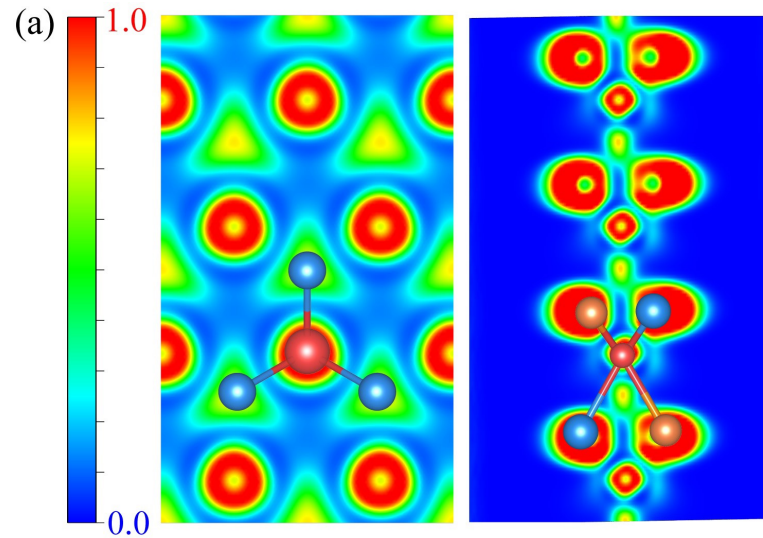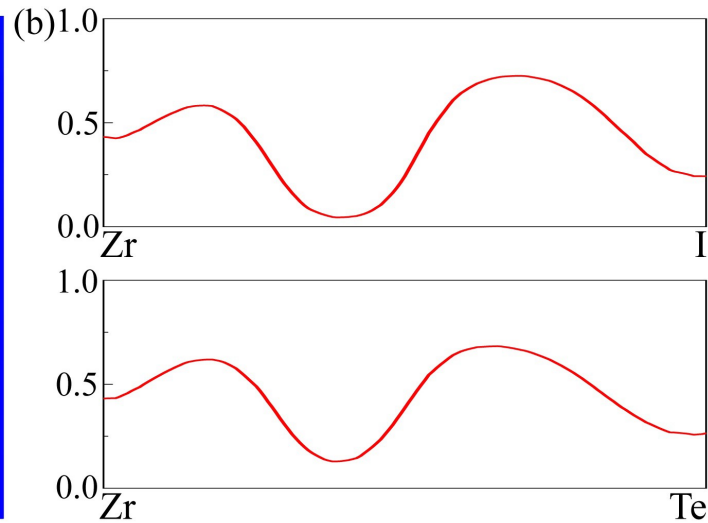

Supplement: d4nr01692k4.pdf [file d4nr01692k4.pdf]

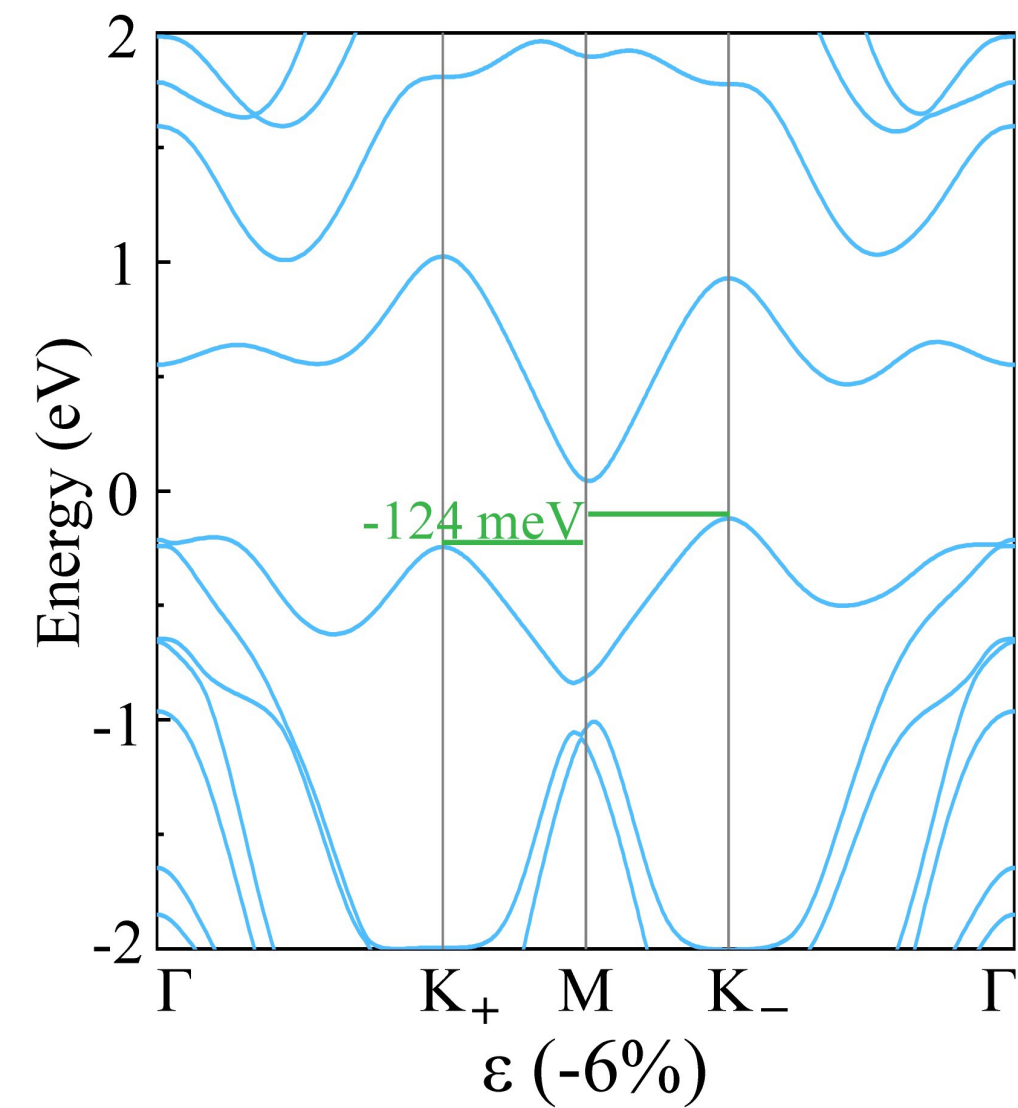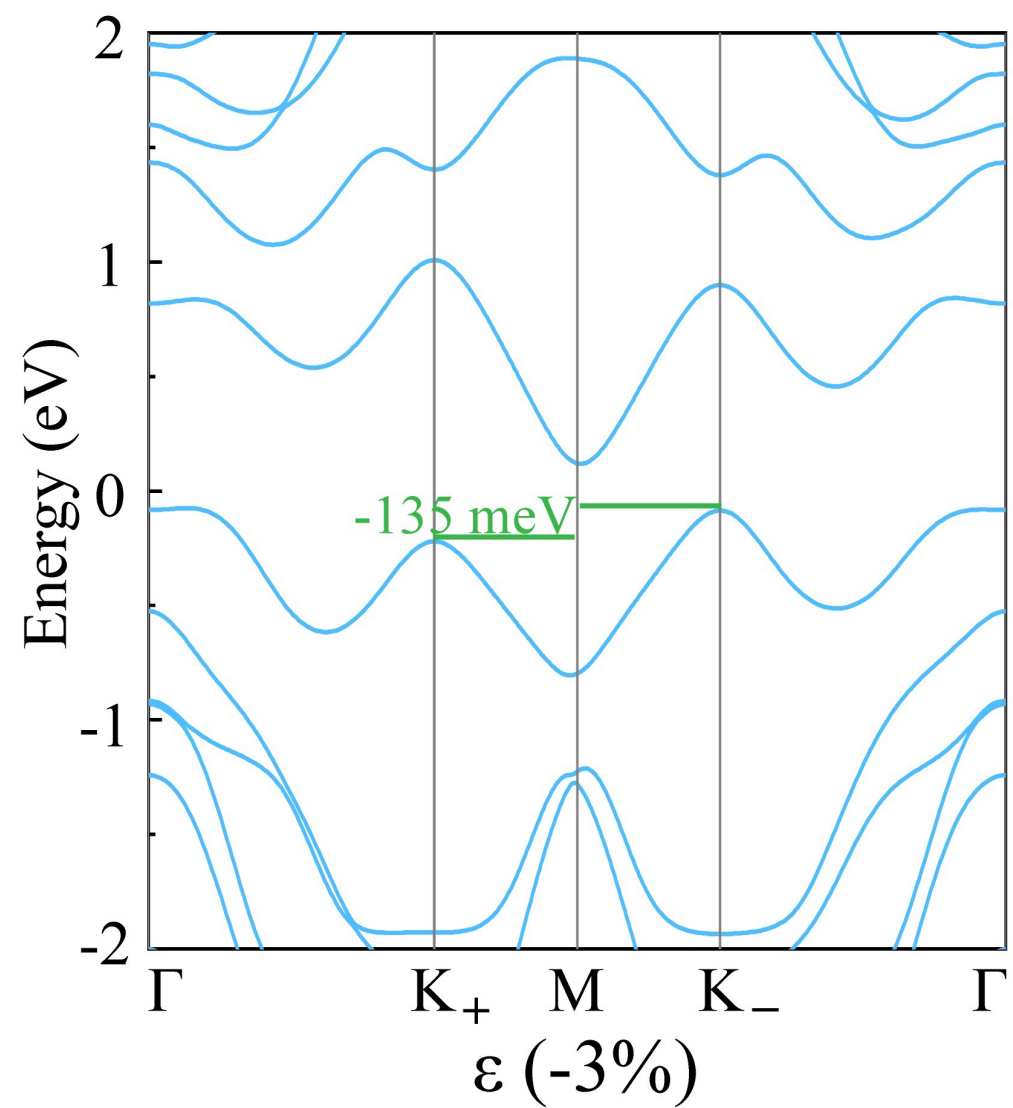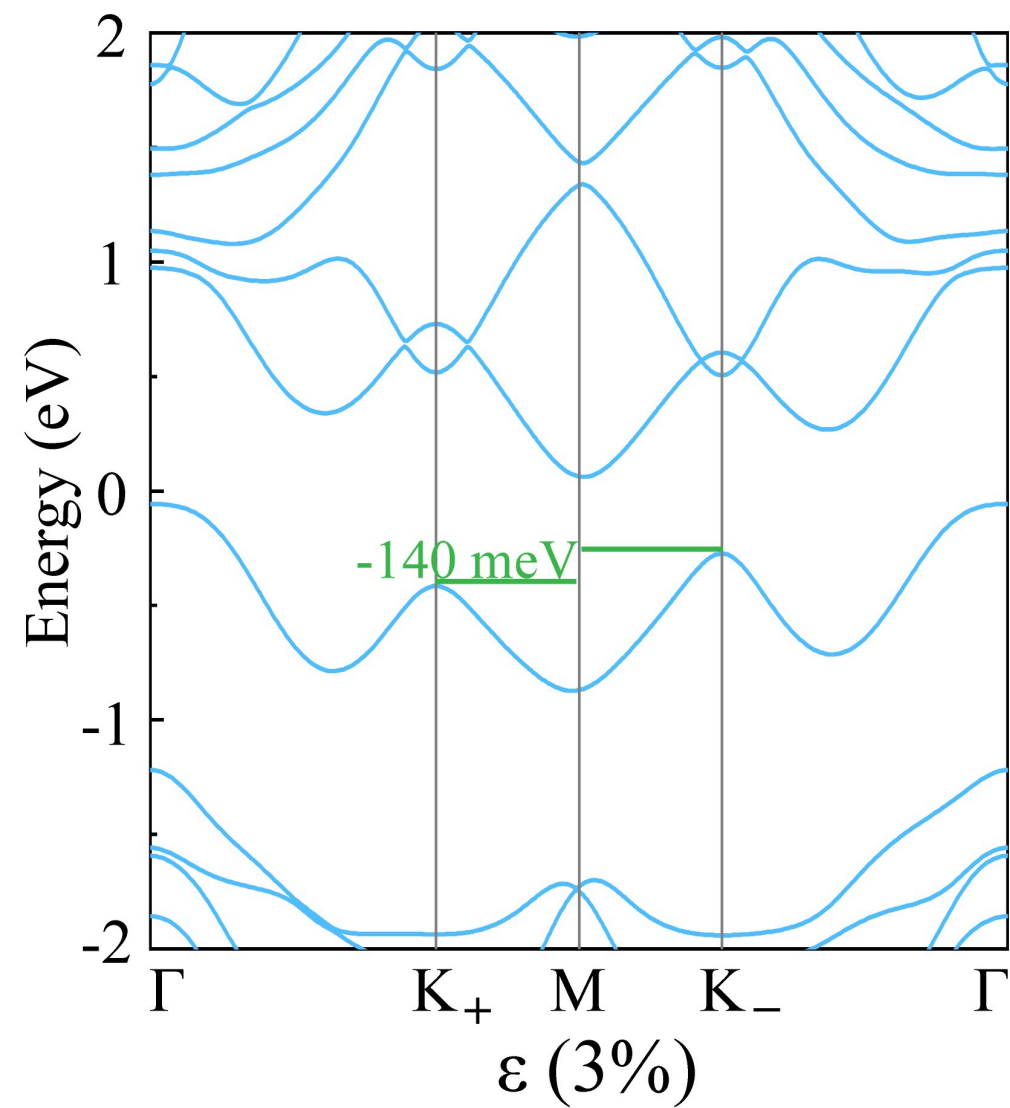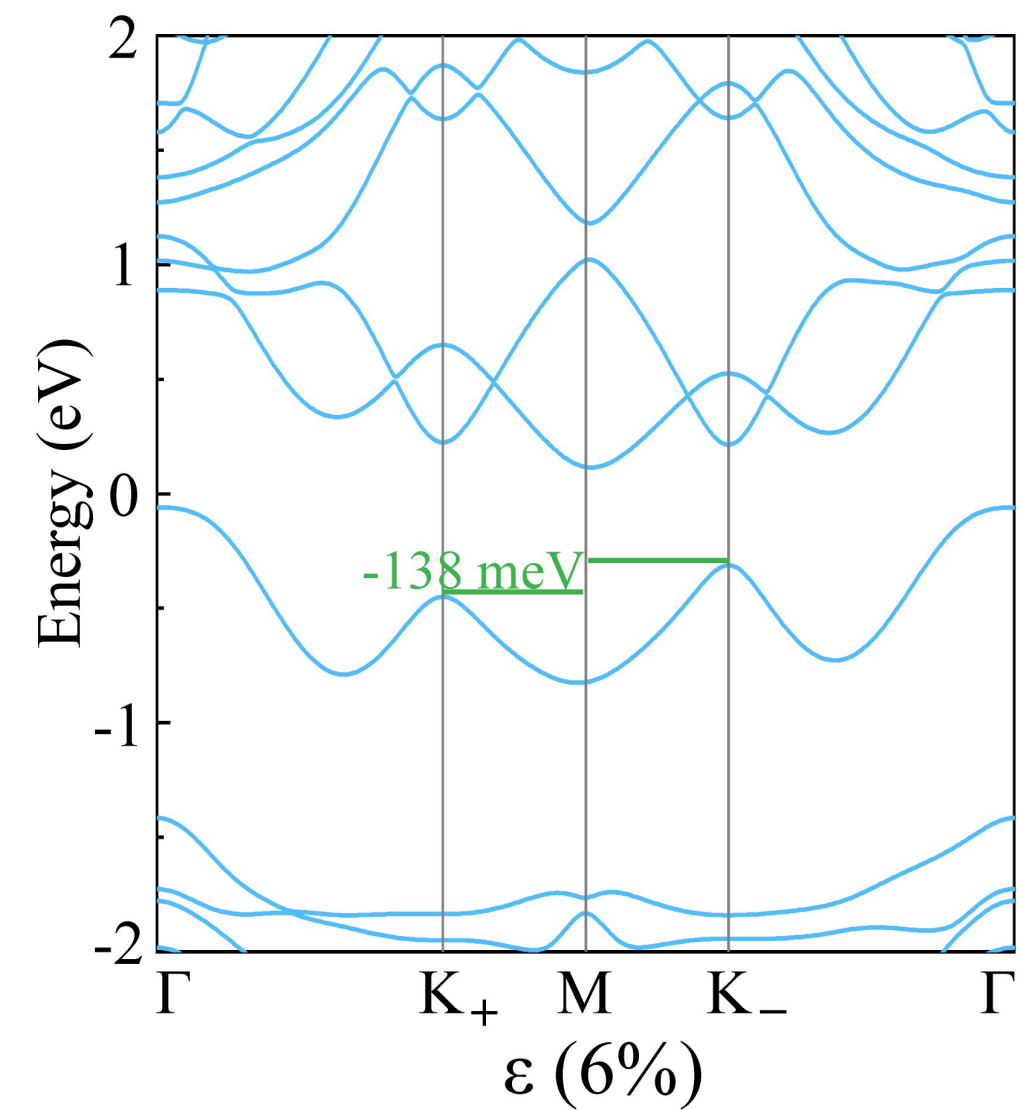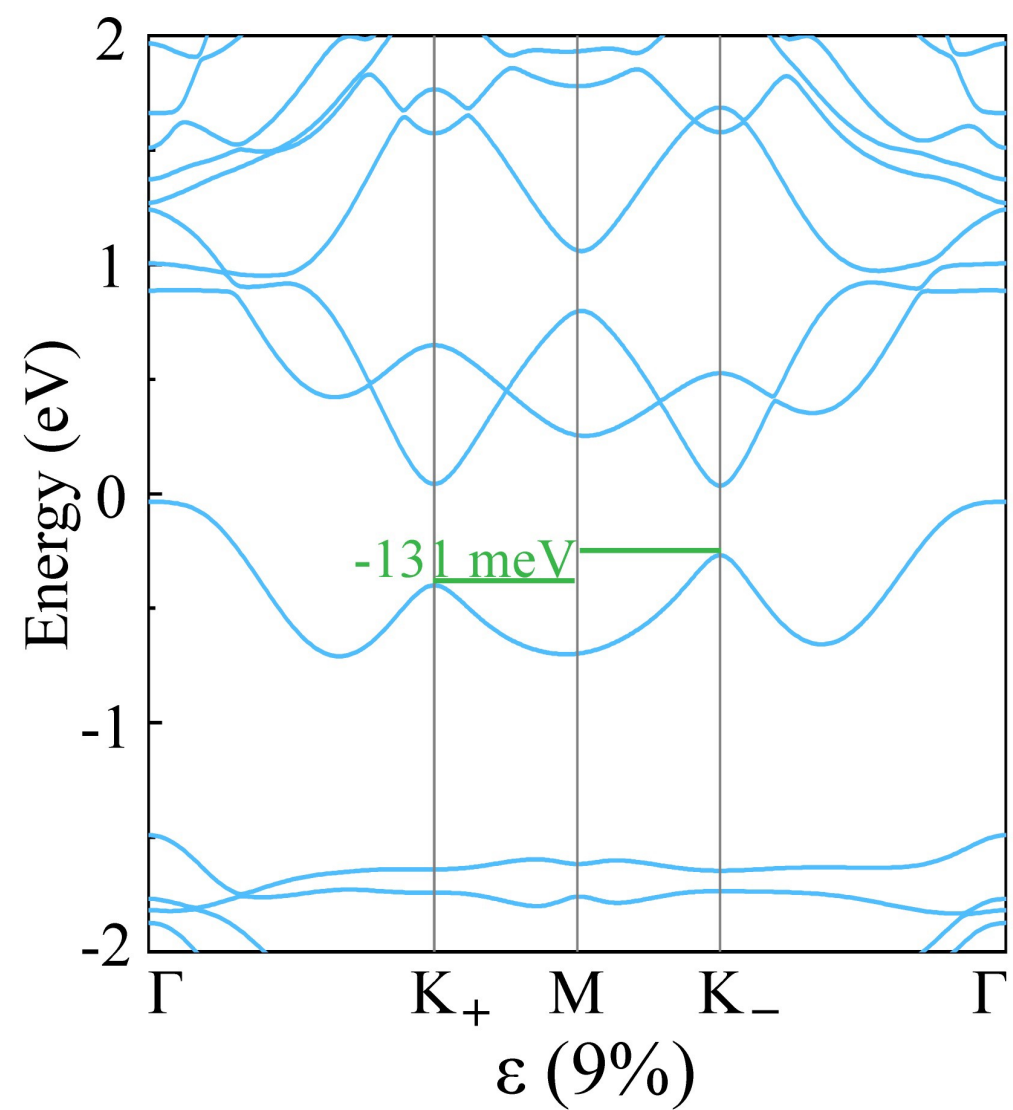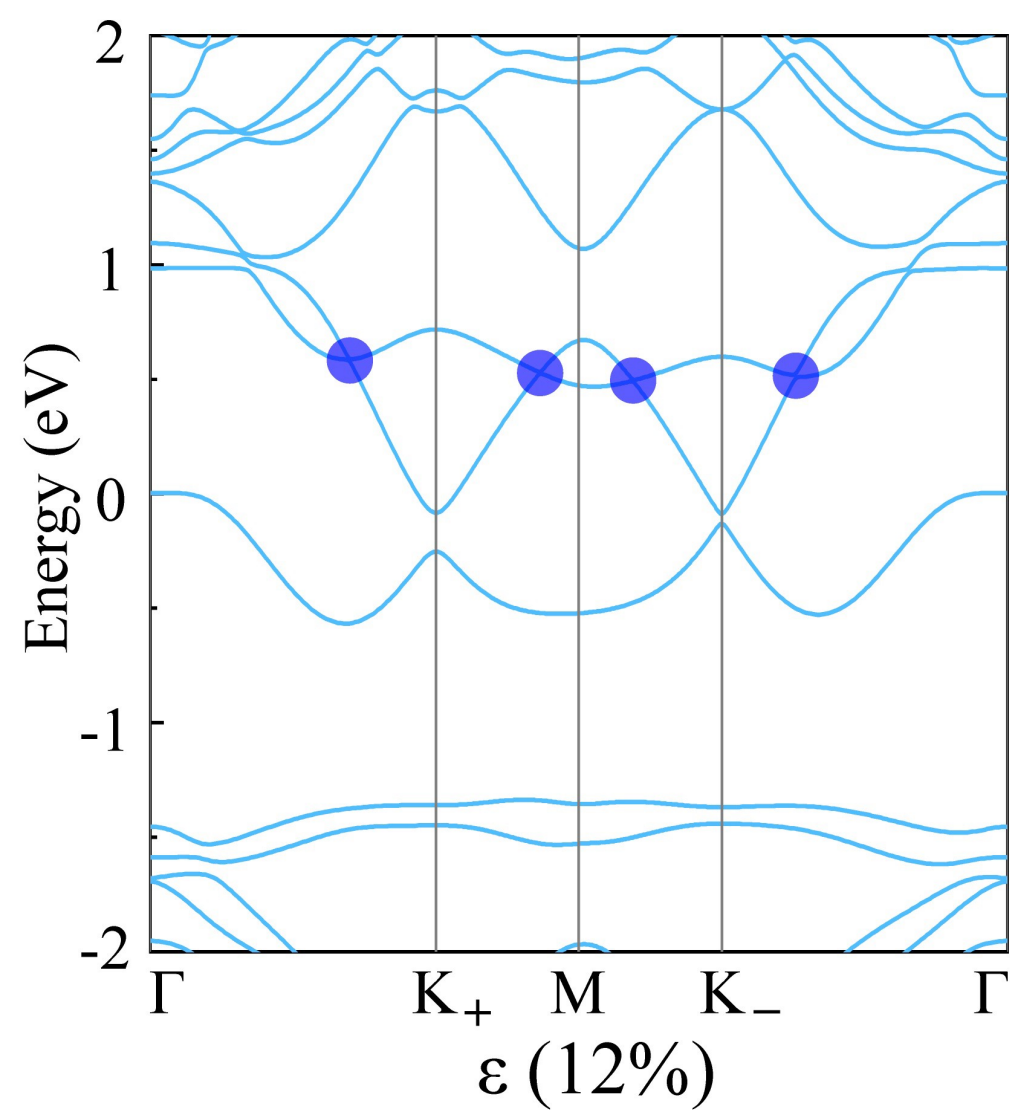

Supplement: d4nr01692k5.pdf [file d4nr01692k5.pdf]

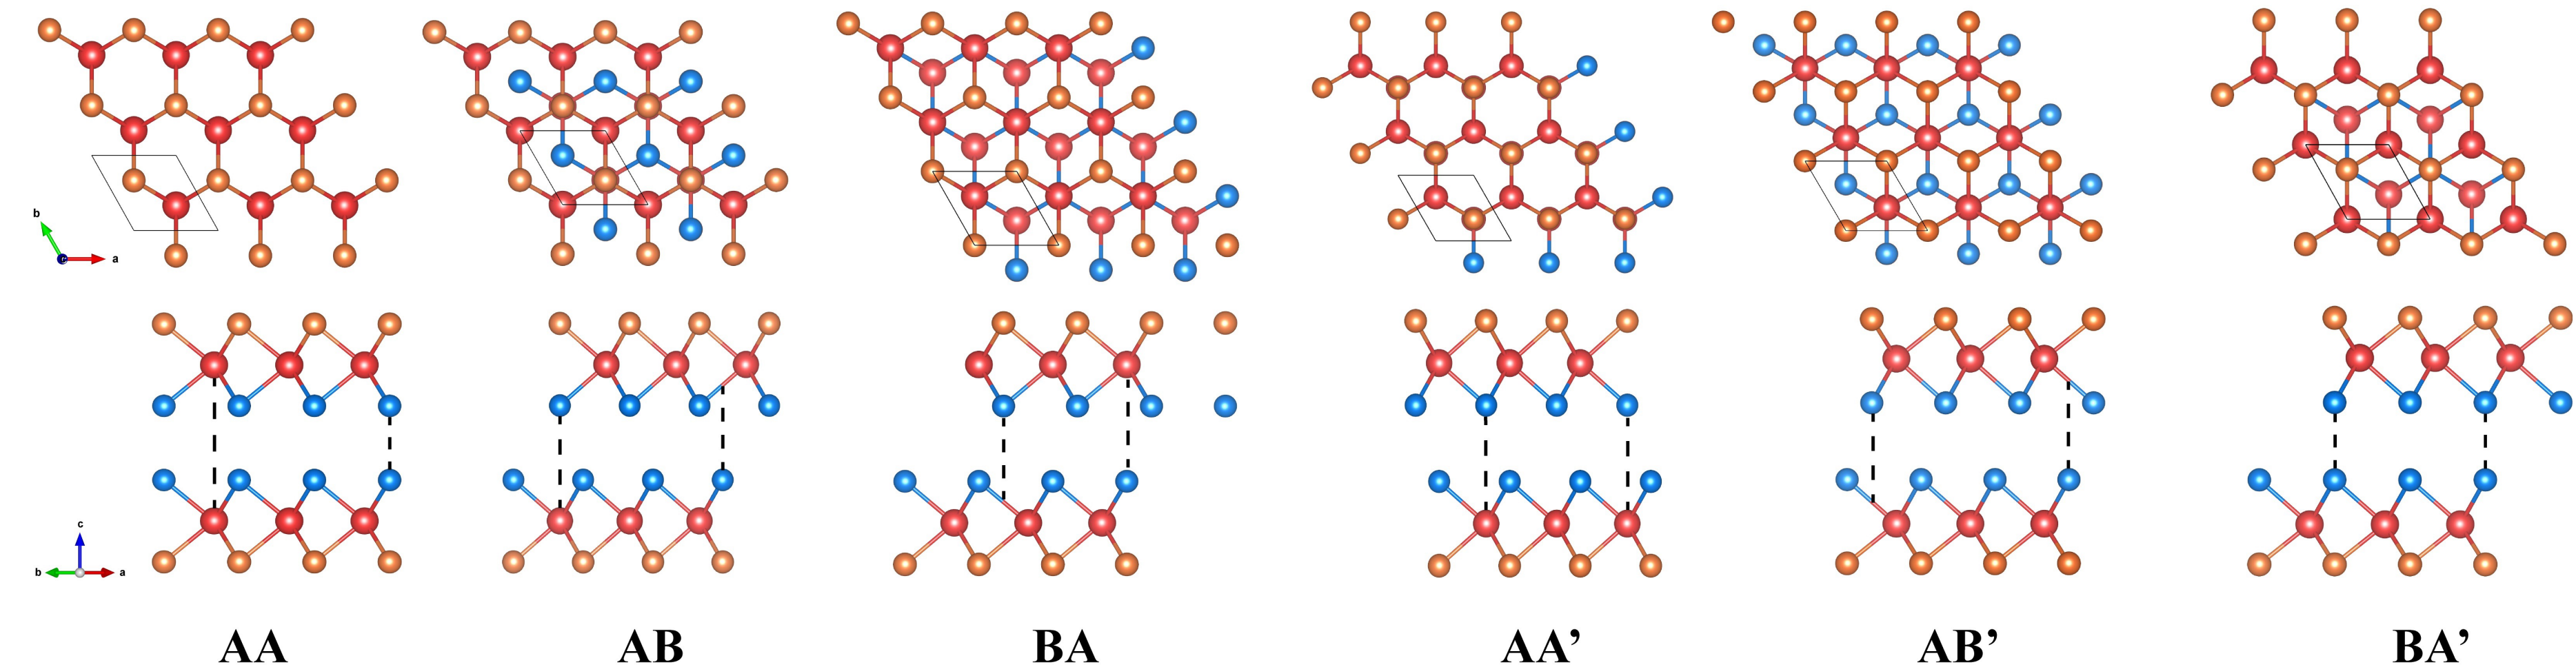

Supplement: d4nr01692k6.pdf [file d4nr01692k6.pdf]

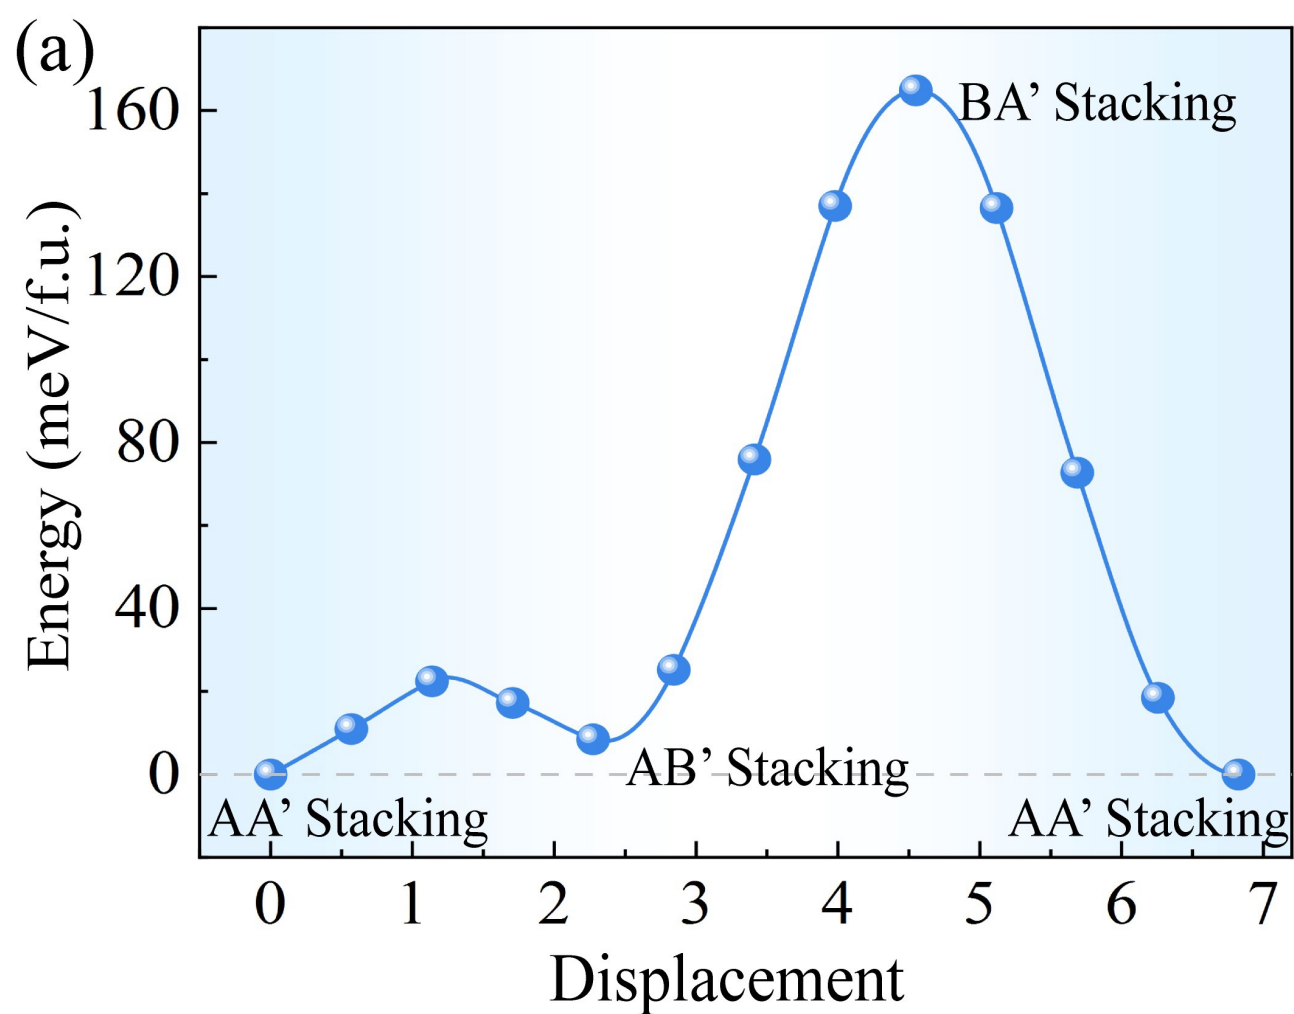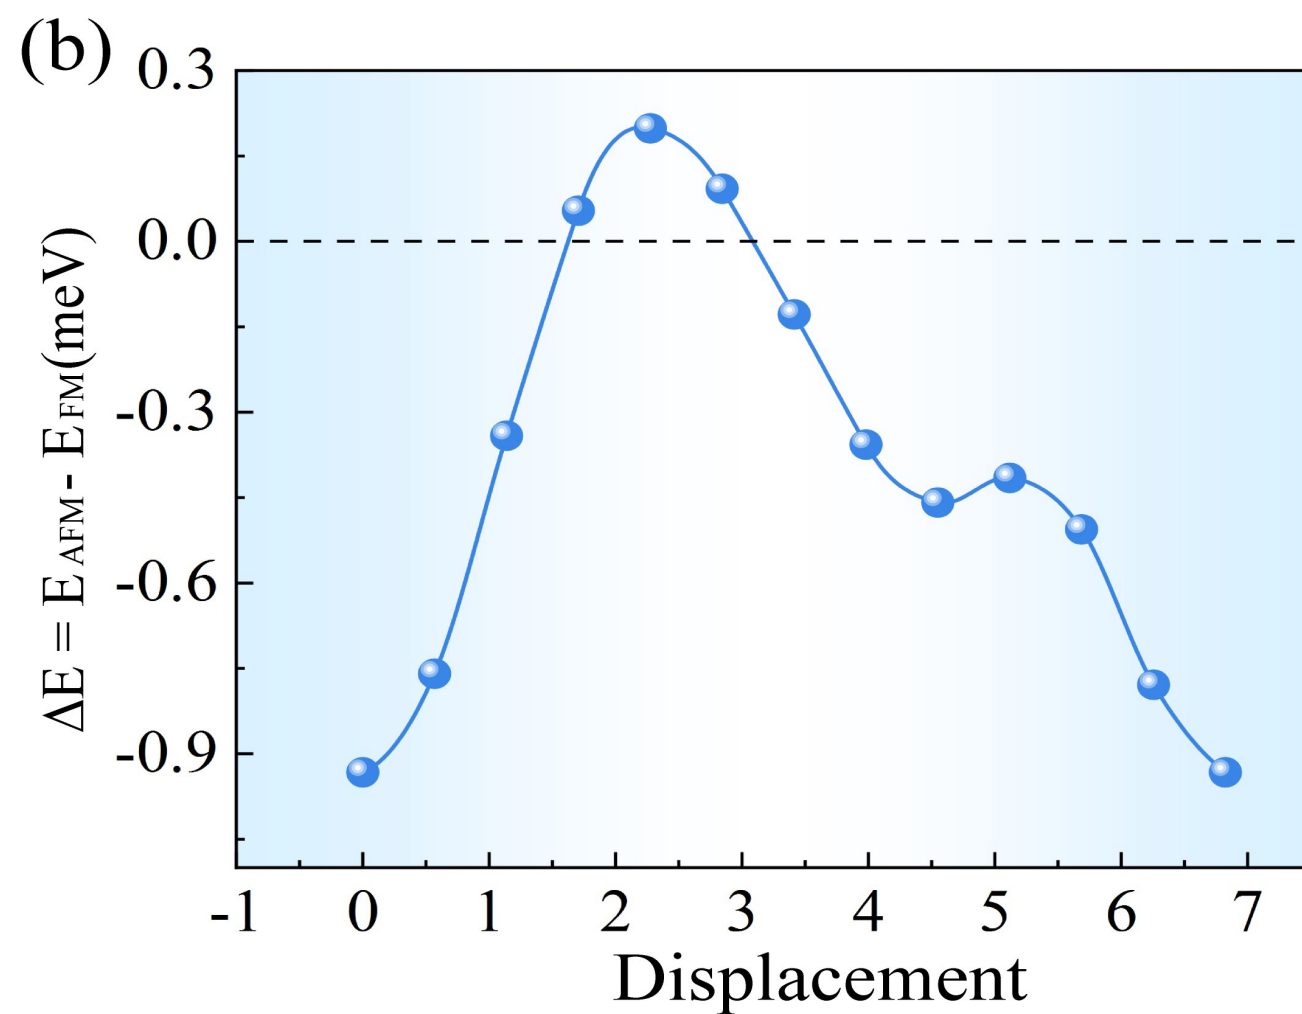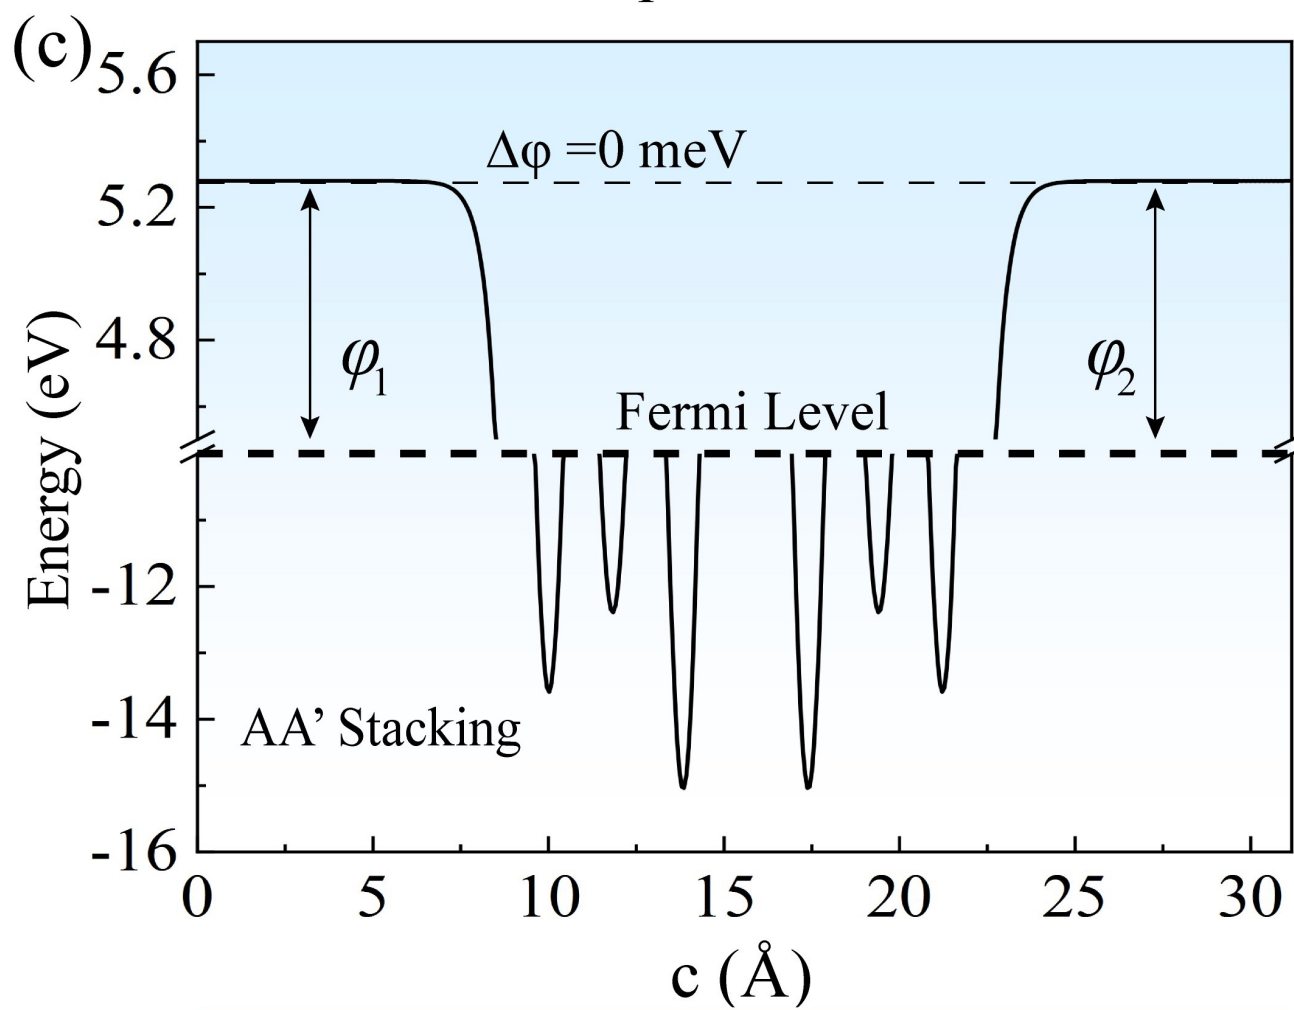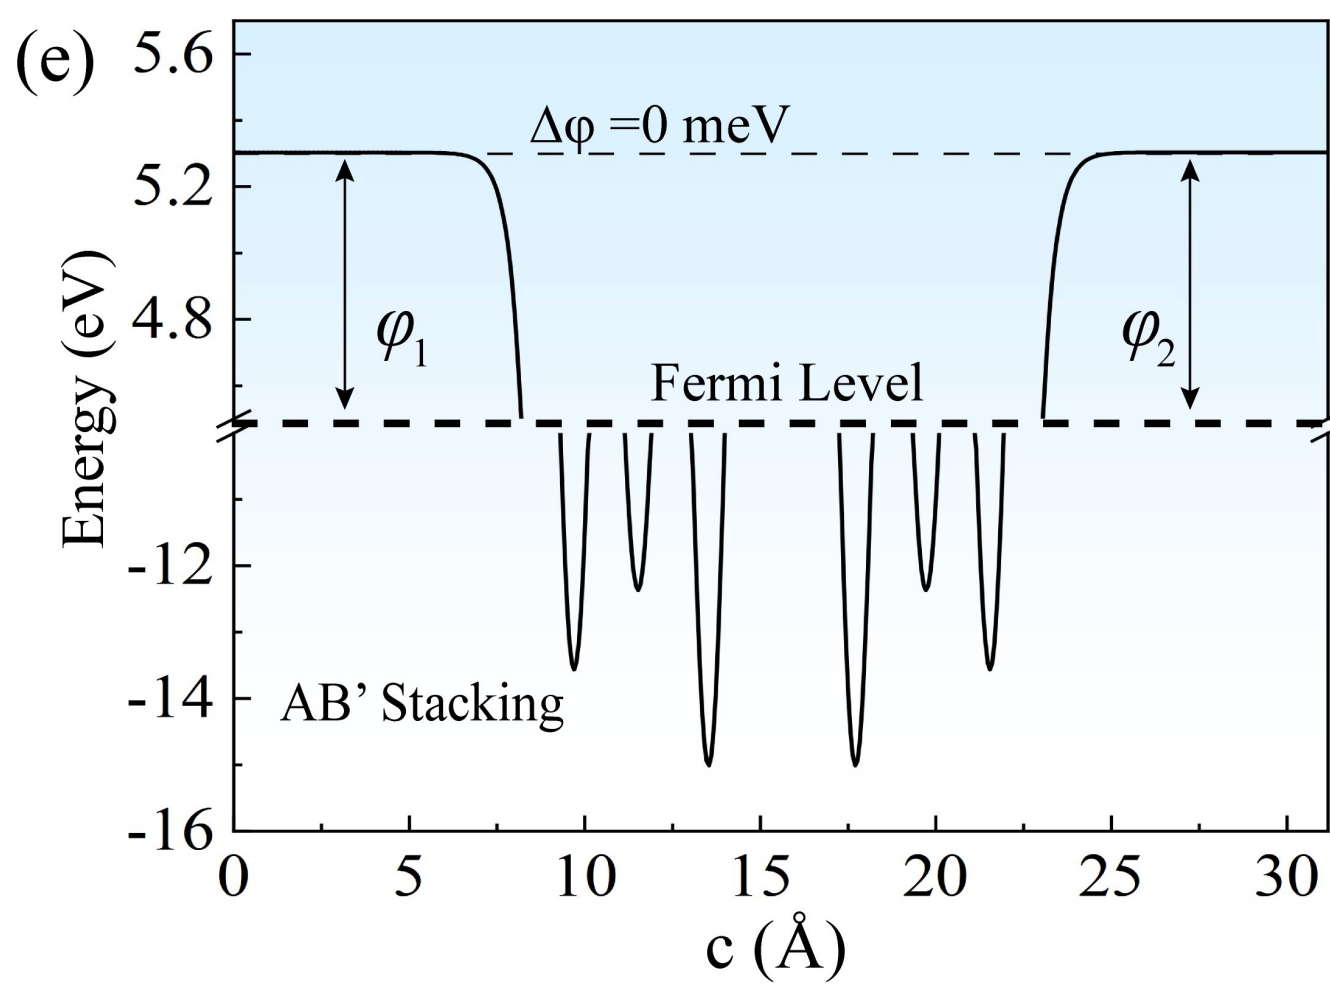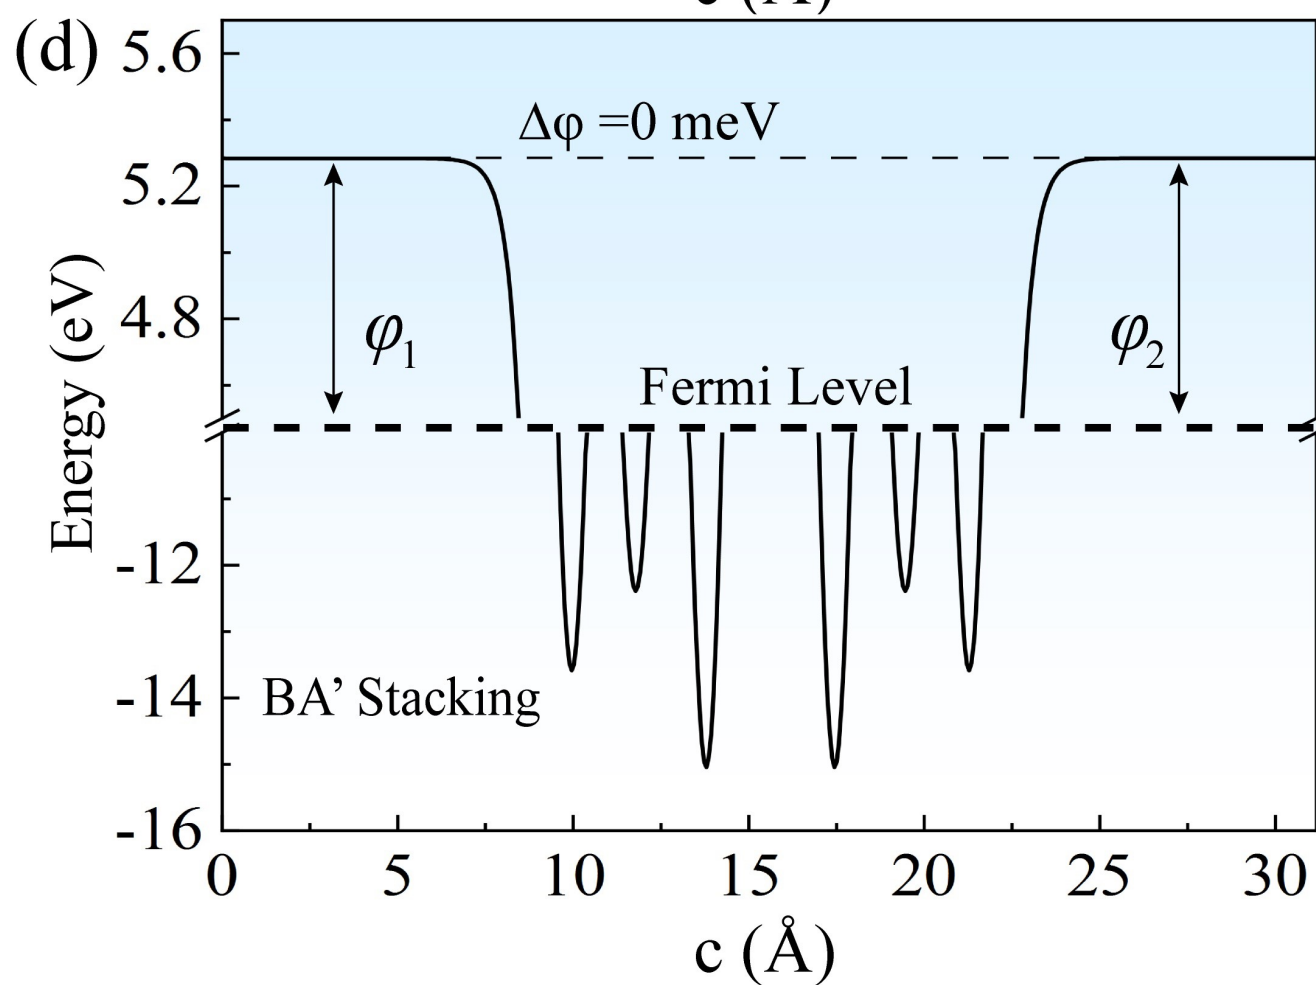

Supplement: d4nr01692k7.pdf [file d4nr01692k7.pdf]

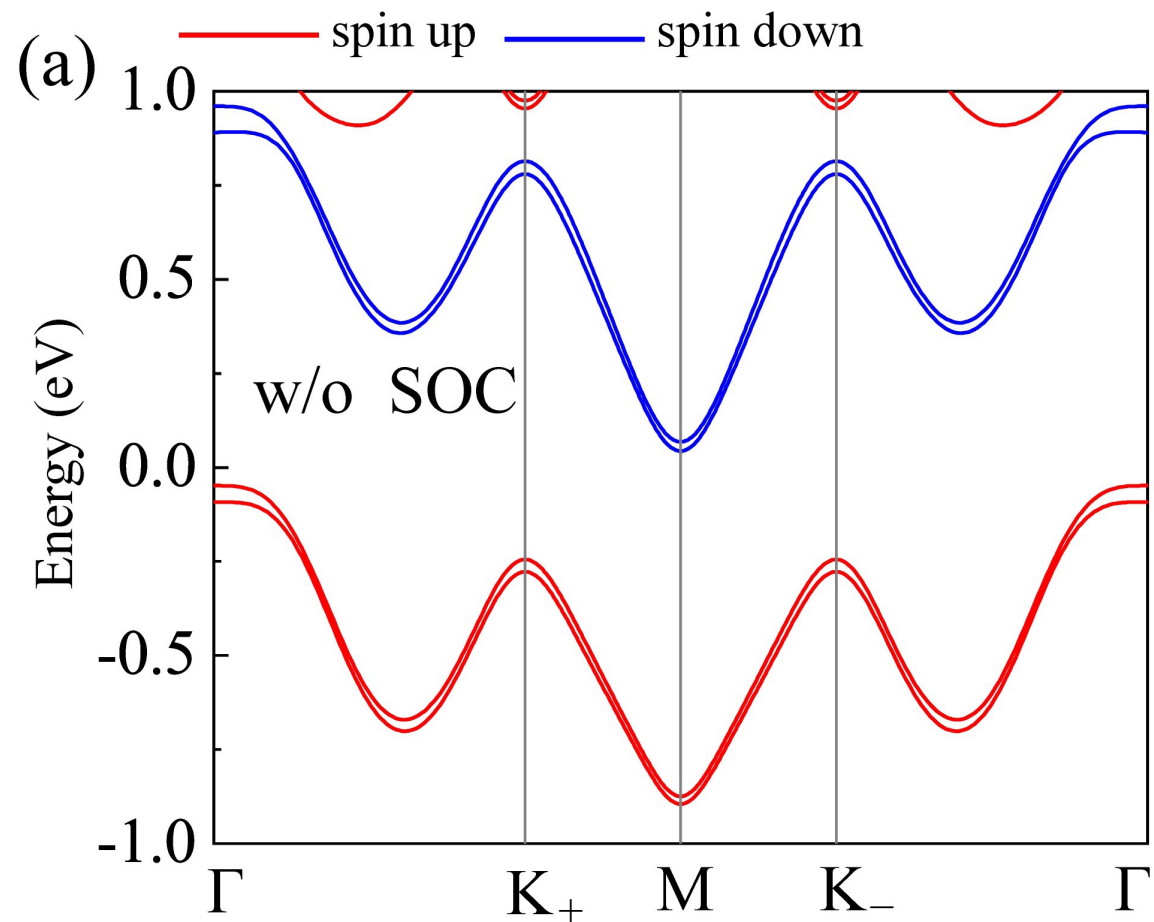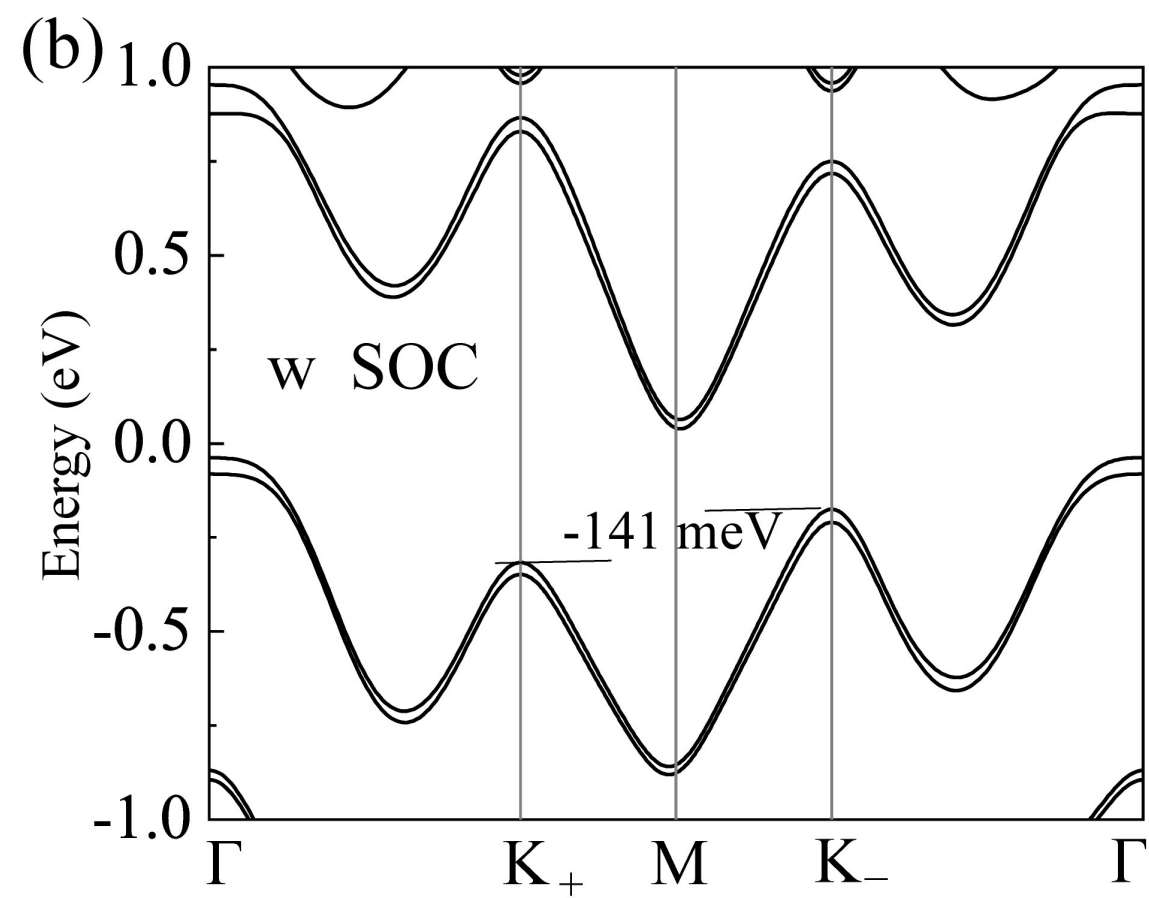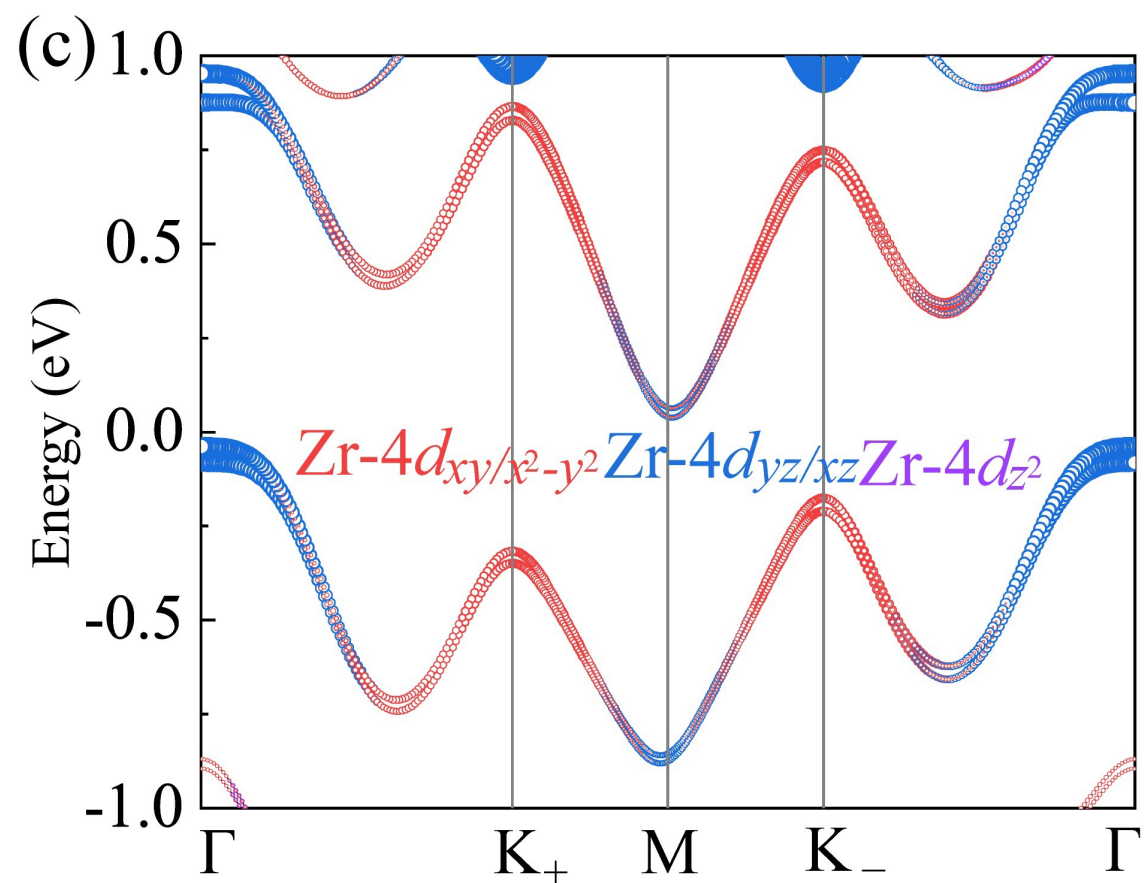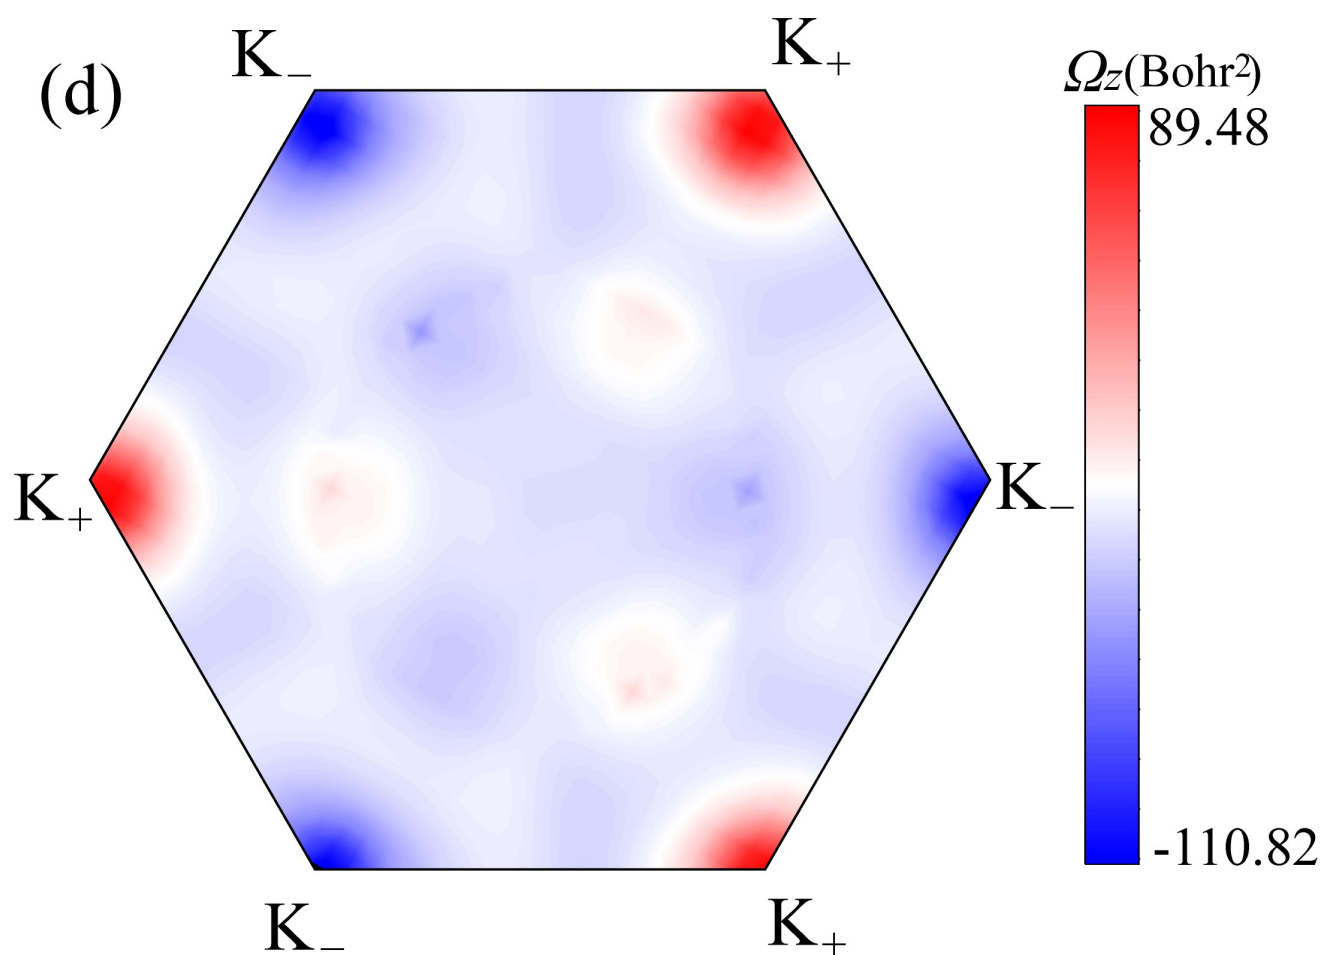

Supplement: d4nr01692k8.pdf [file d4nr01692k8.pdf]

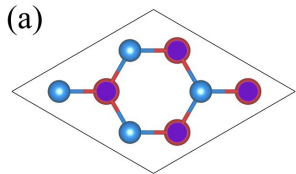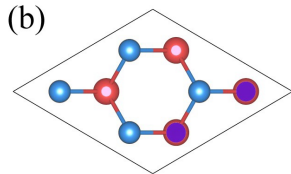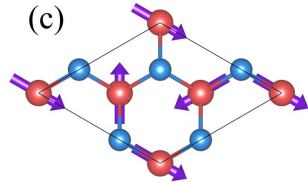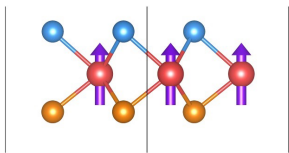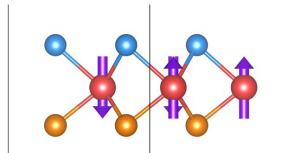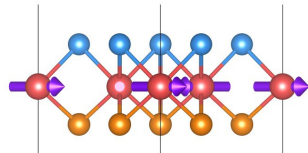

Supplement: d4nr01692k9.pdf [file d4nr01692k9.pdf]
